# Supplementary material for: 4-Anilinoquinazoline-based benzenesulfonamides as nanomolar inhibitors of carbonic anhydrase isoforms I, II, IX, and XII: design, synthesis, in-vitro, and in-silico biological studies
Source: PubMed Central journal article supplement (PMC8973350; doi:10.1080/14756366.2022.2055553), 2022-03-30
Supplement: IENZ_A_2055553_SM0917.pdf [file IENZ_A_2055553_SM0917.pdf]

**4-Anilinoquinazoline-based Benzenesulfonamides as Nanomolar  
Inhibitors of Carbonic Anhydrase Isoforms I, II, IX, and XII:  
Design, Synthesis, *In-vitro*, and *In-silico* Biological Studies**

Contents

1.  $^1\text{H}$ NMR and  $^{13}\text{C}$ NMR data of compounds **3a-d** and **4a-l**
2. Representative HPLC purity data of the compounds **3a-d** and **4a-l**
3. Representative HRMS data of the compounds **3a-d** and **4a-l**
4. Supplementary docking figures

# 1. <sup>1</sup>HNMR and <sup>13</sup>CNMR data of compounds 3a–d and 4a–f

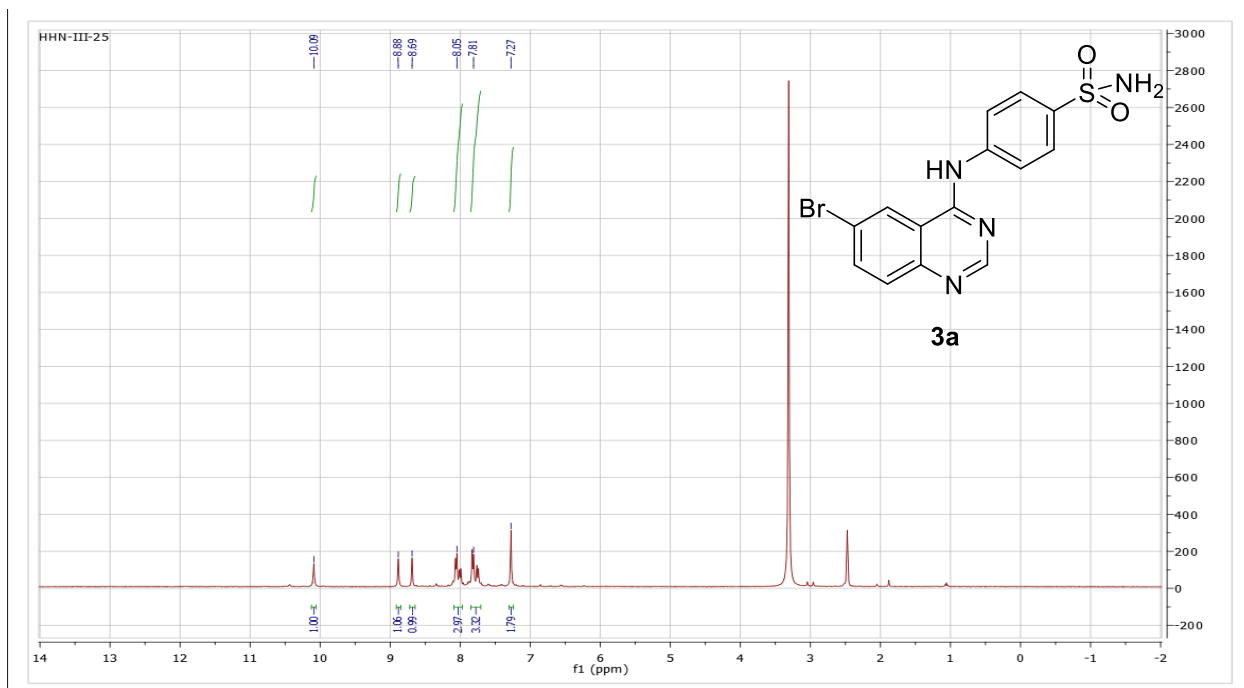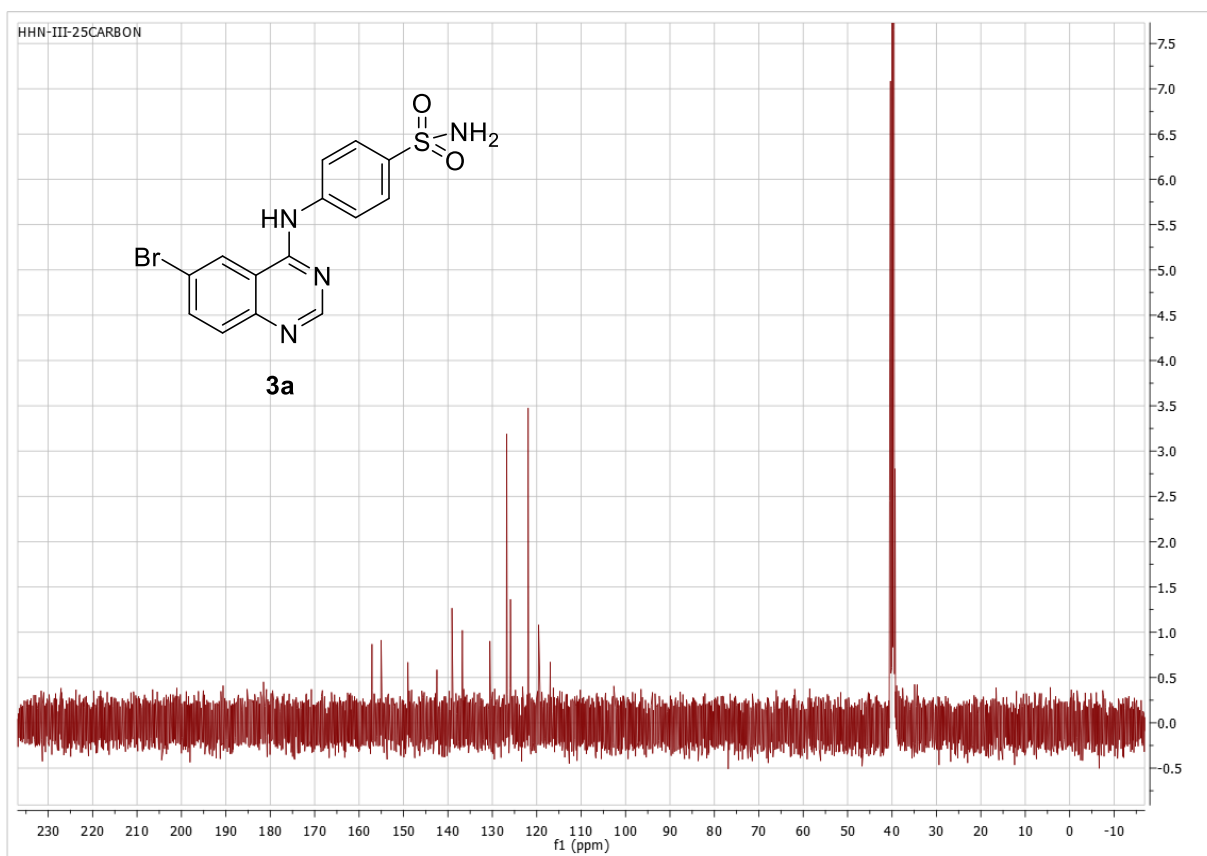

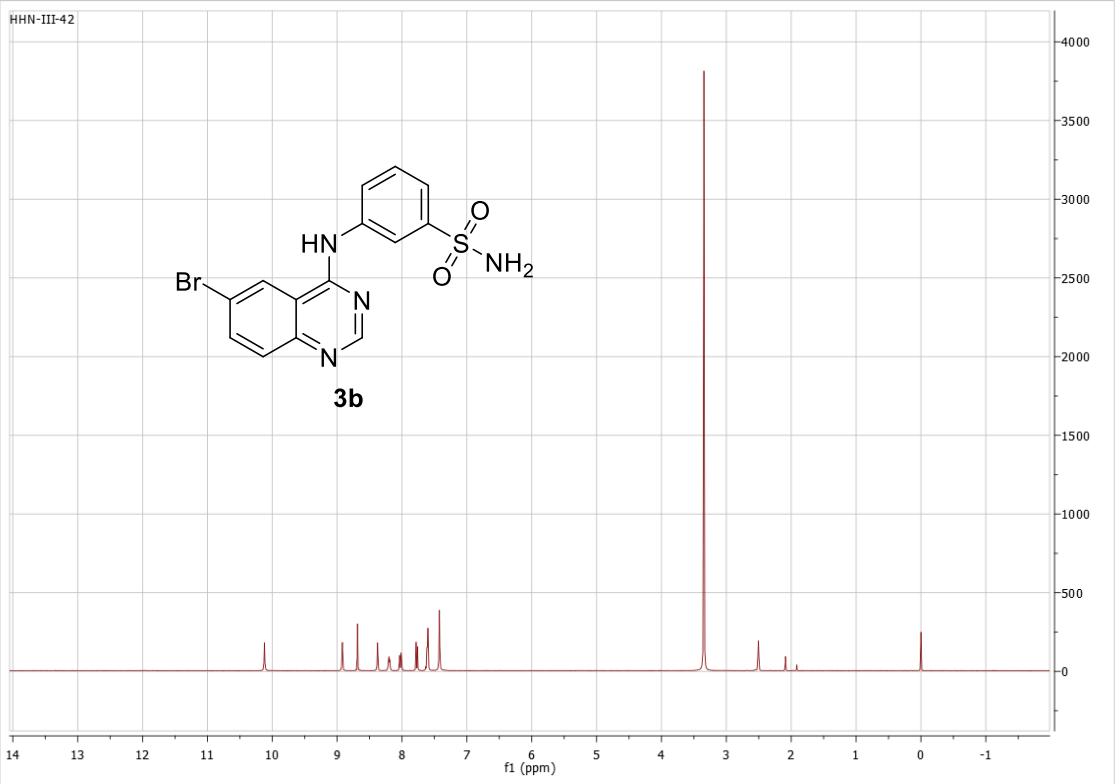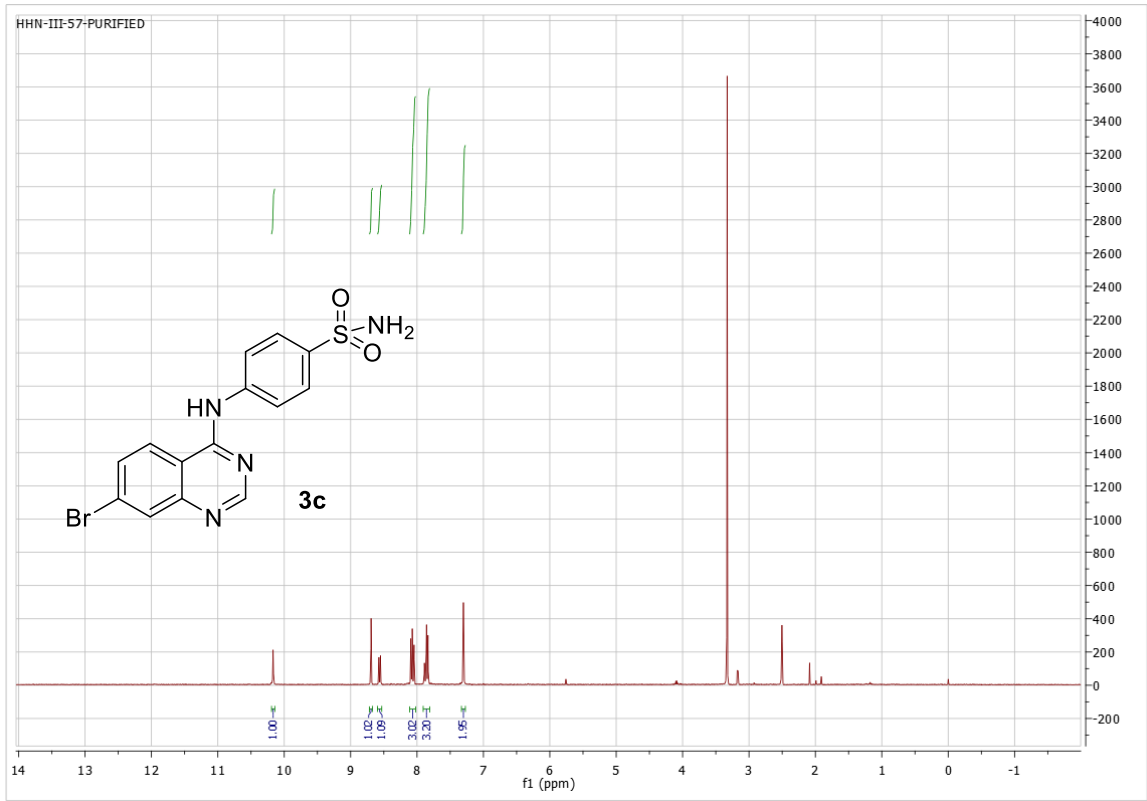

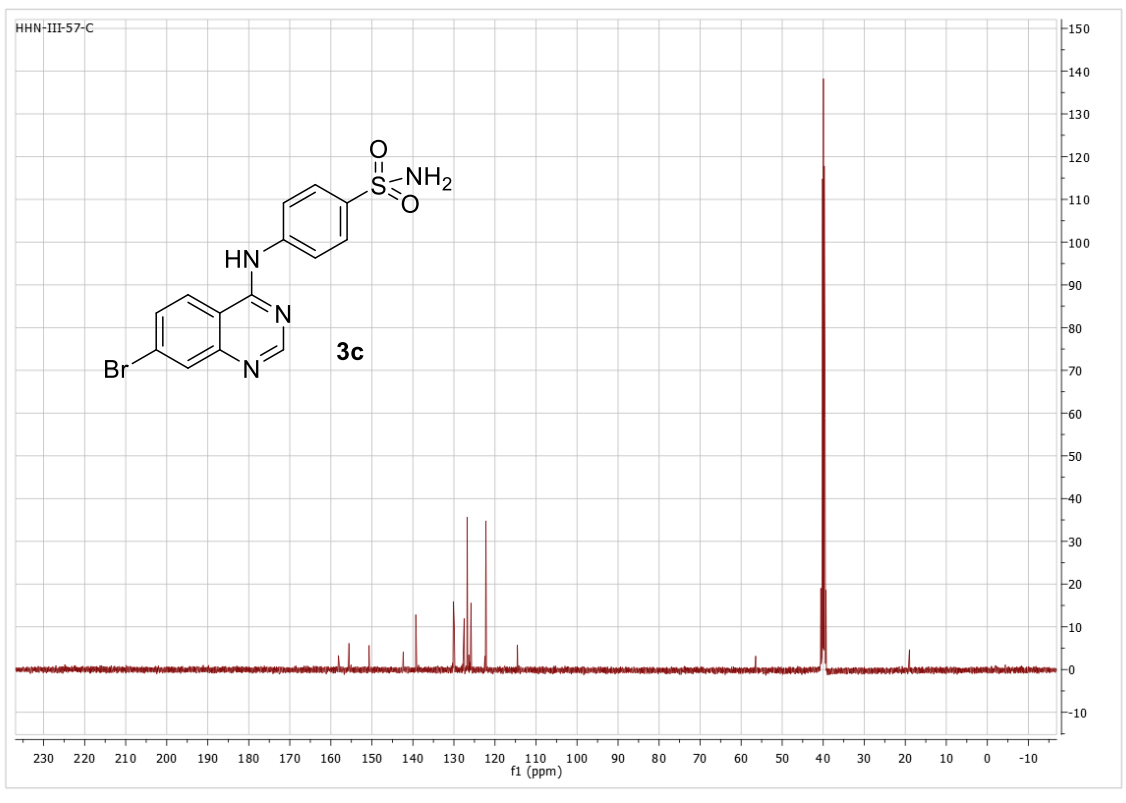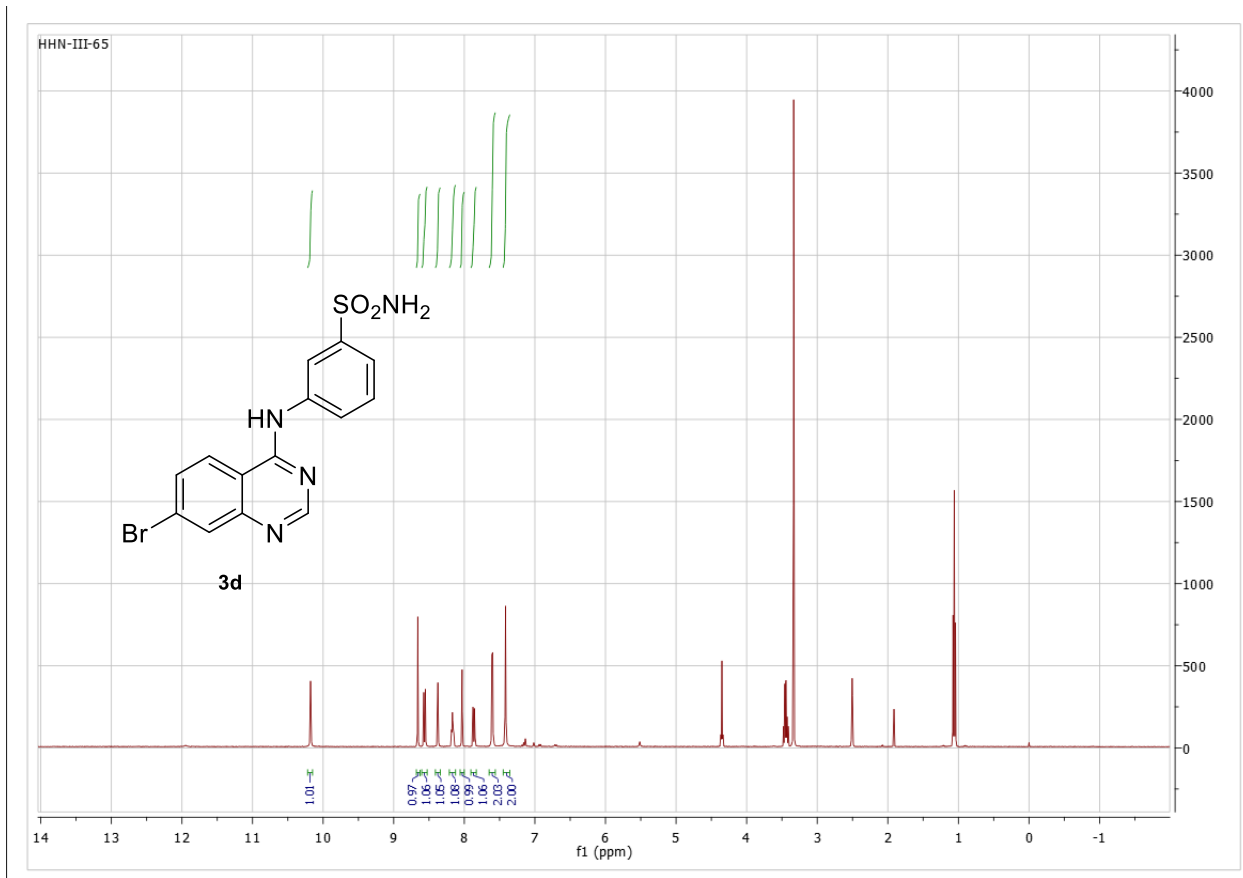

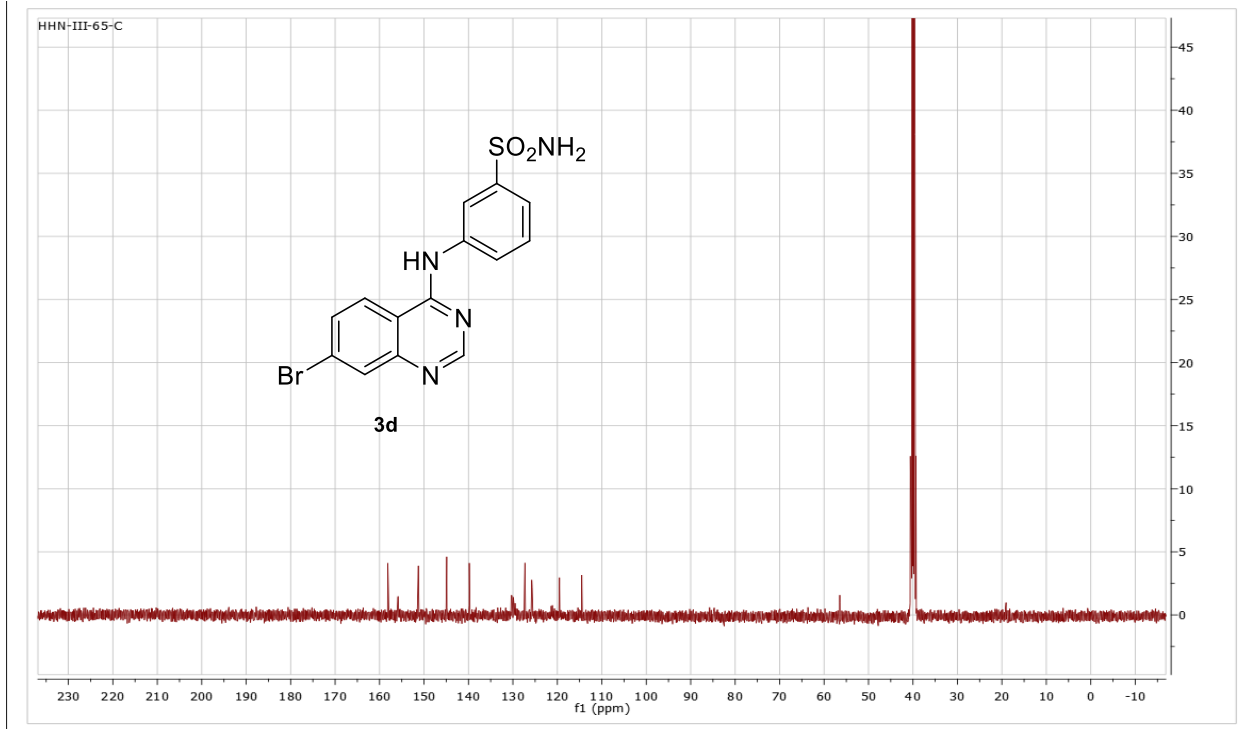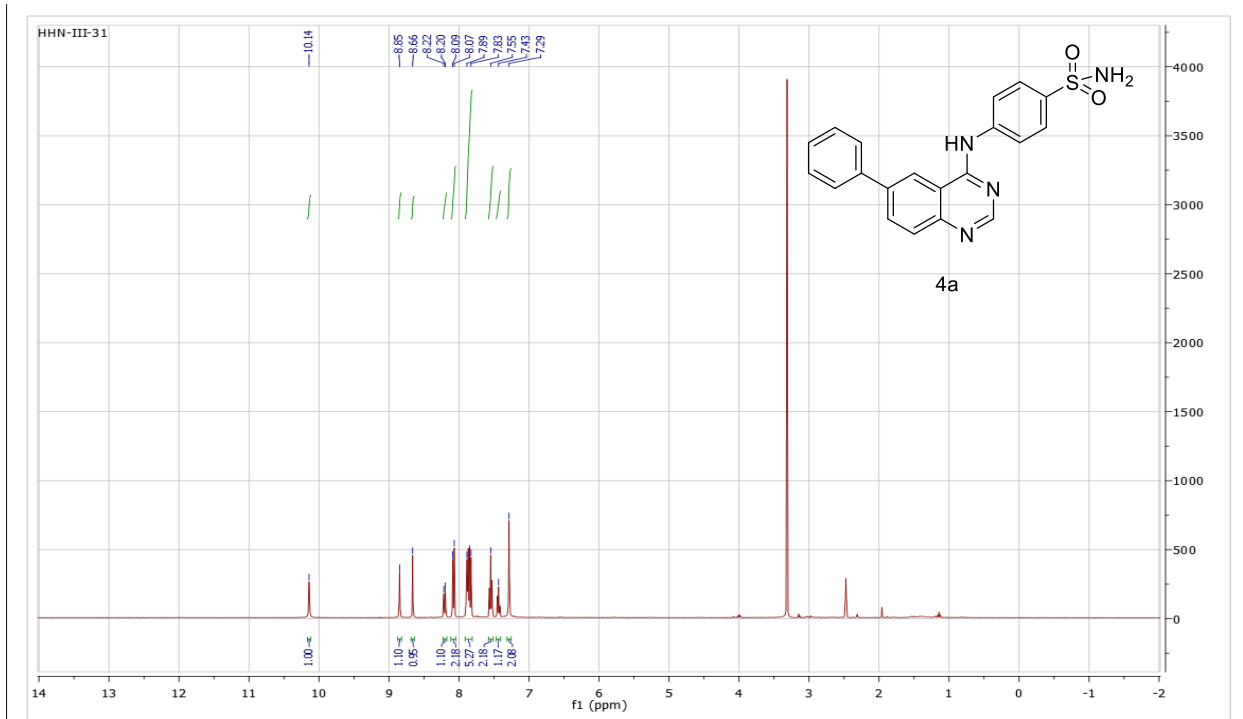

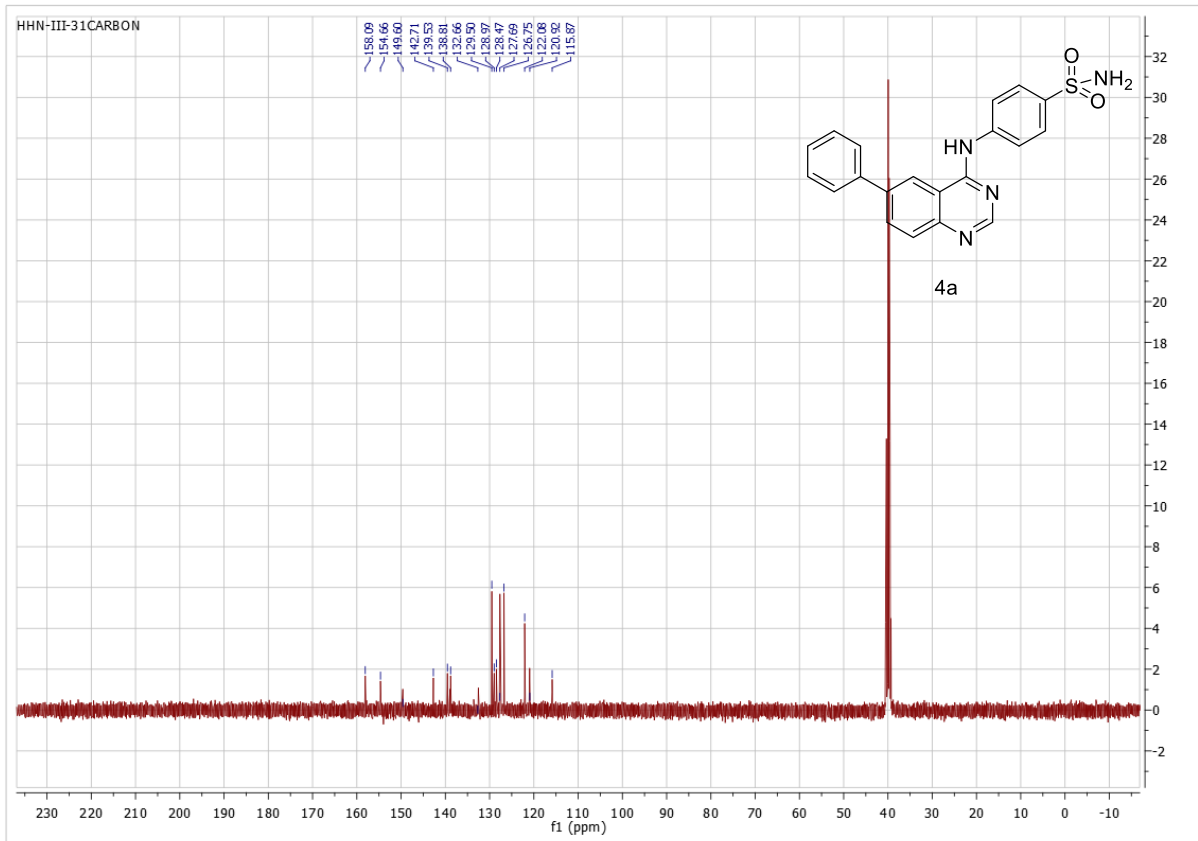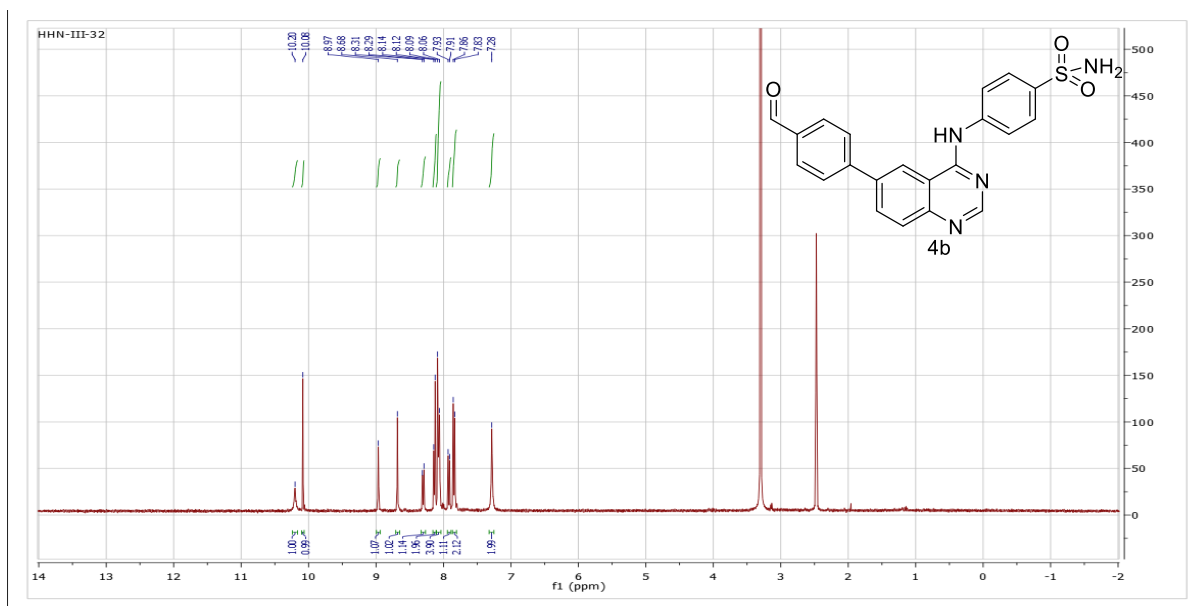

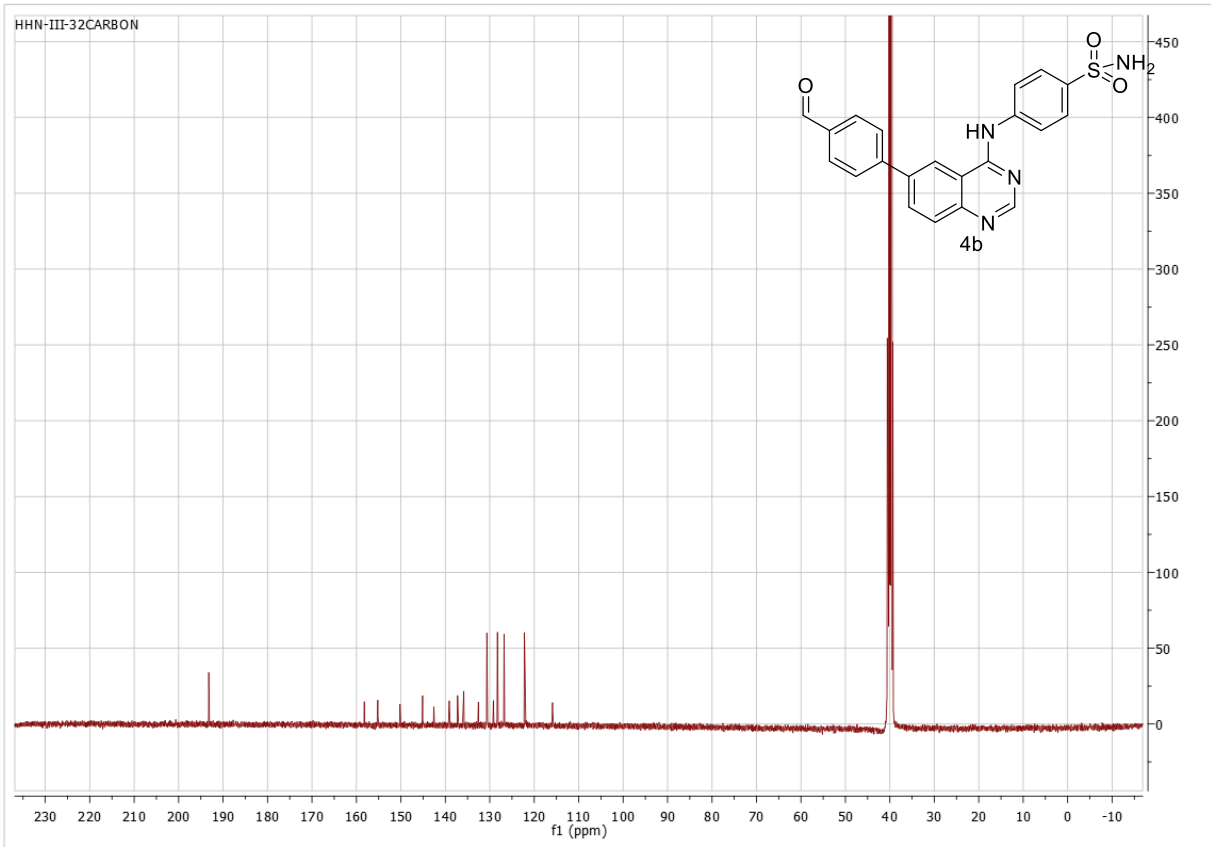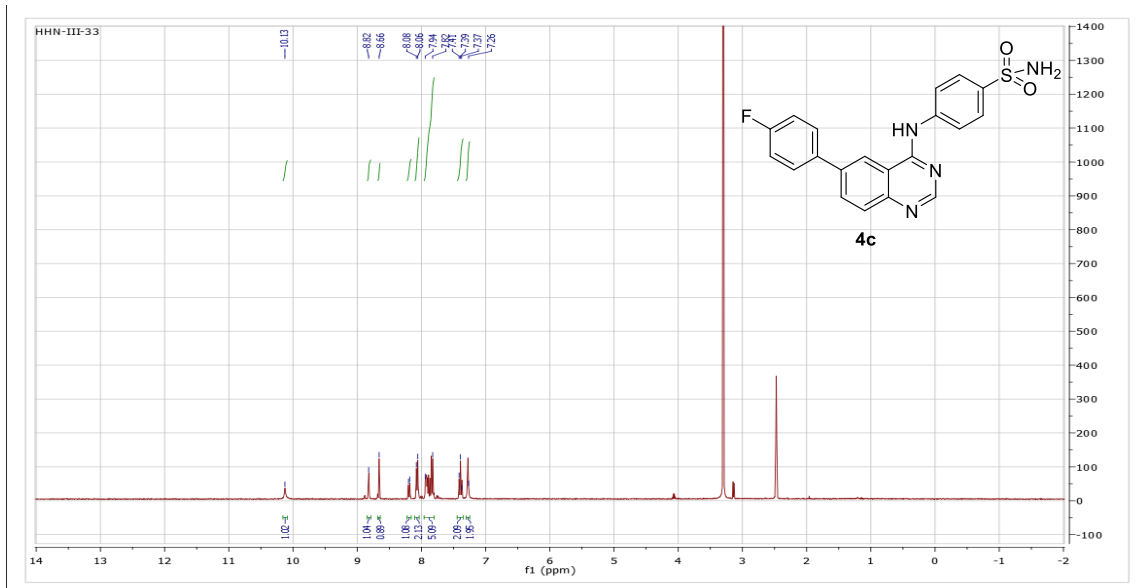

HHN-III-33carbon

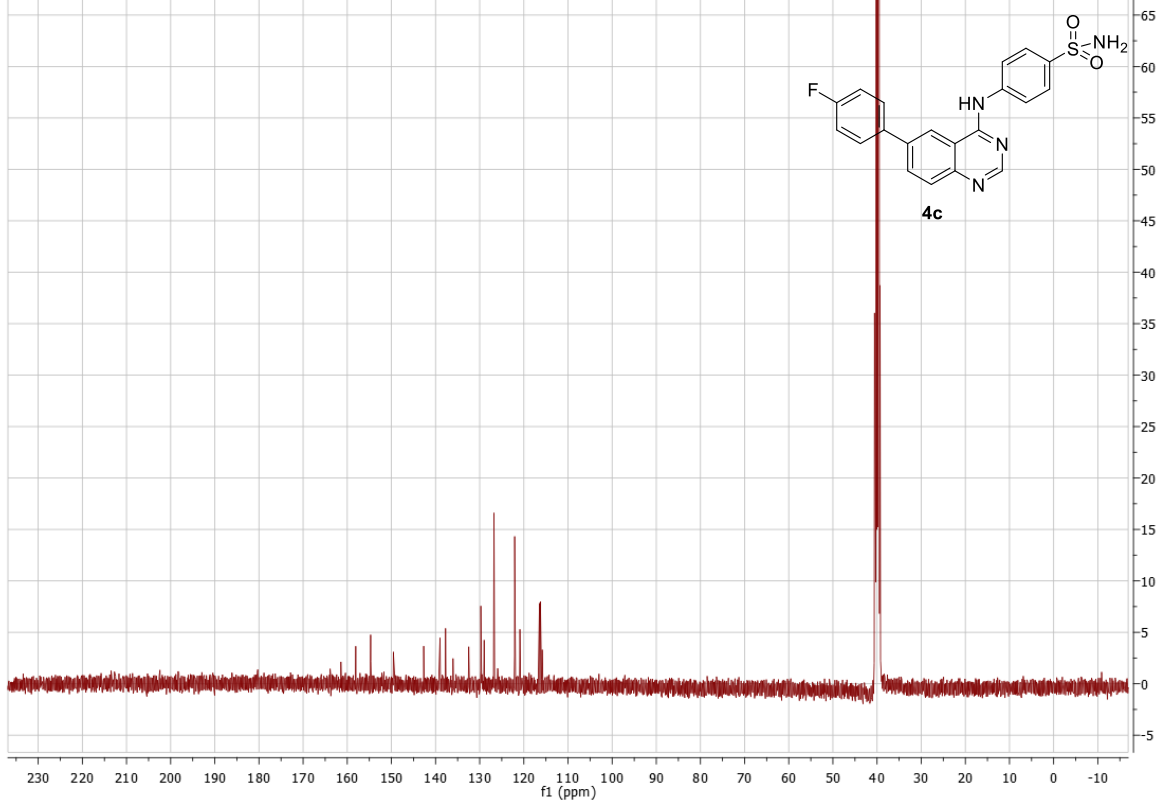

HHN-III-34

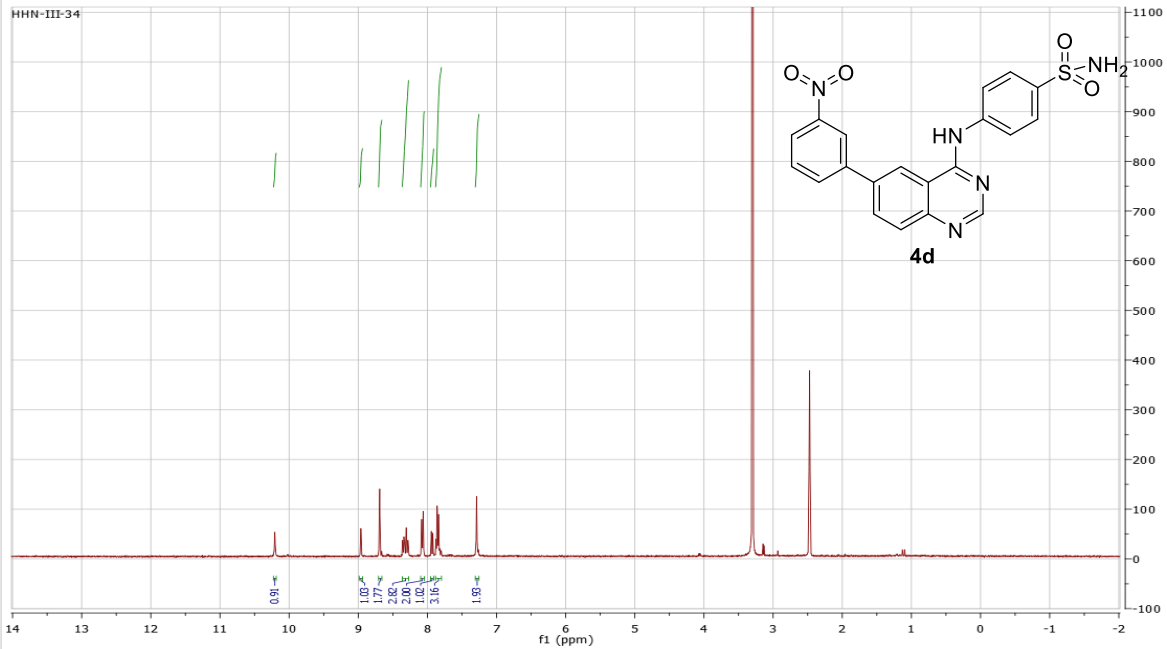



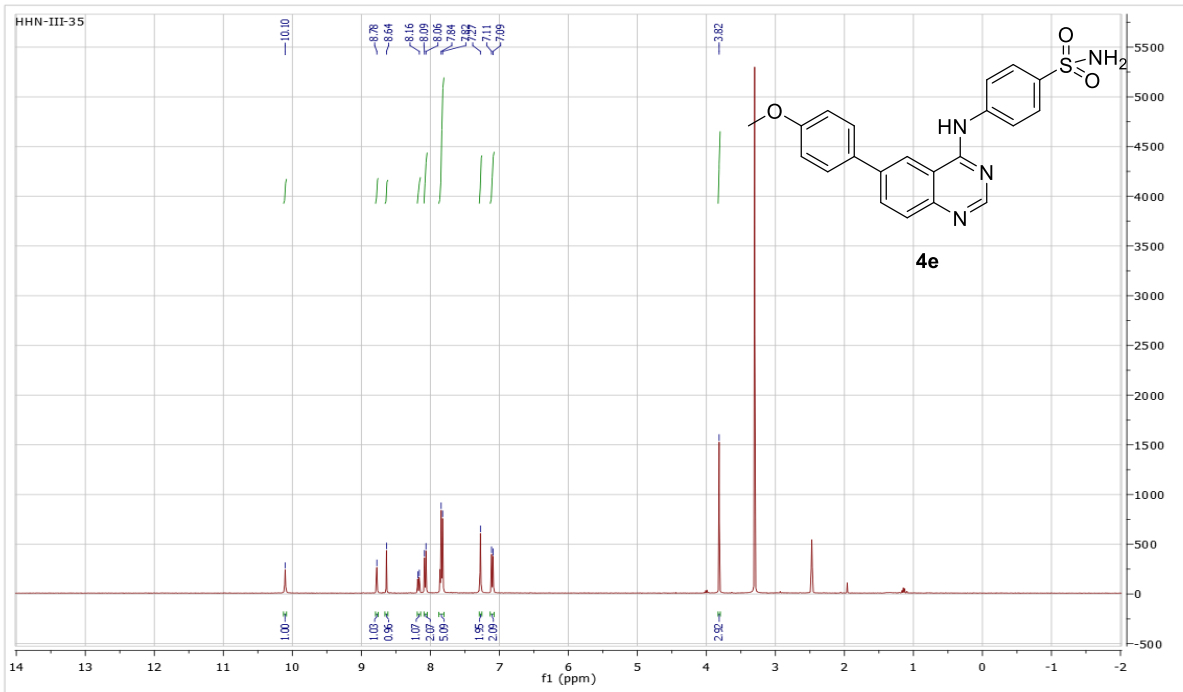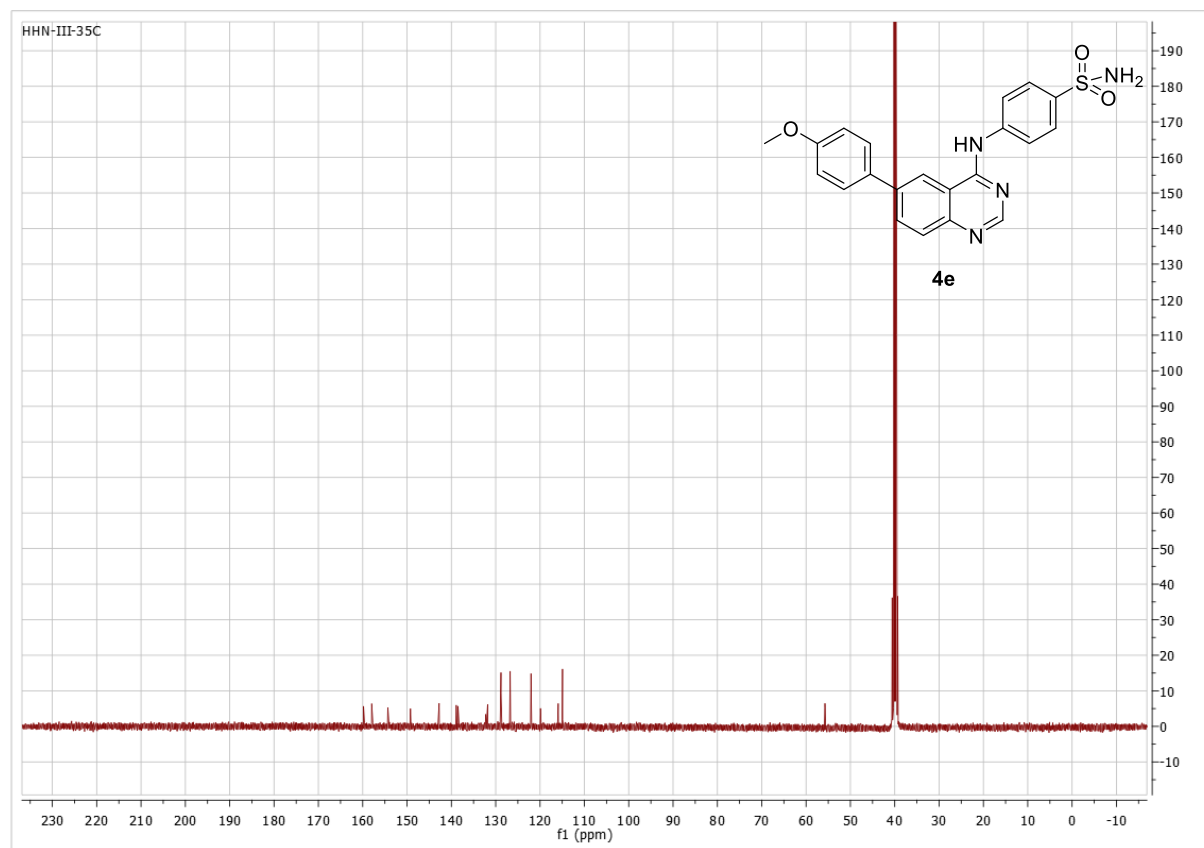

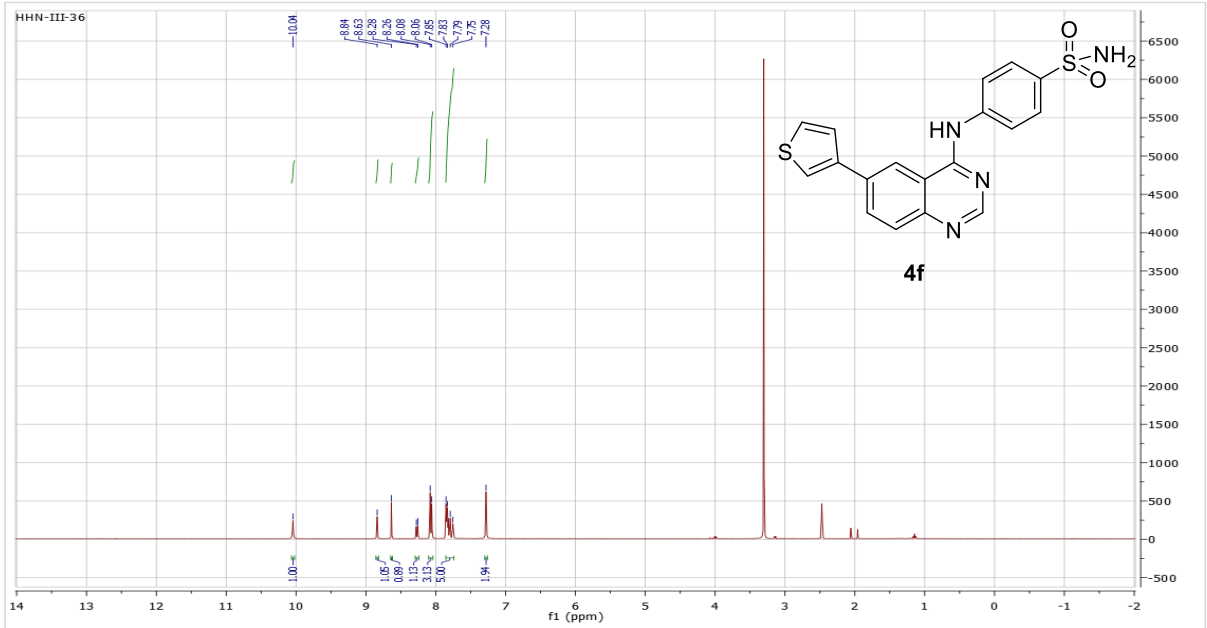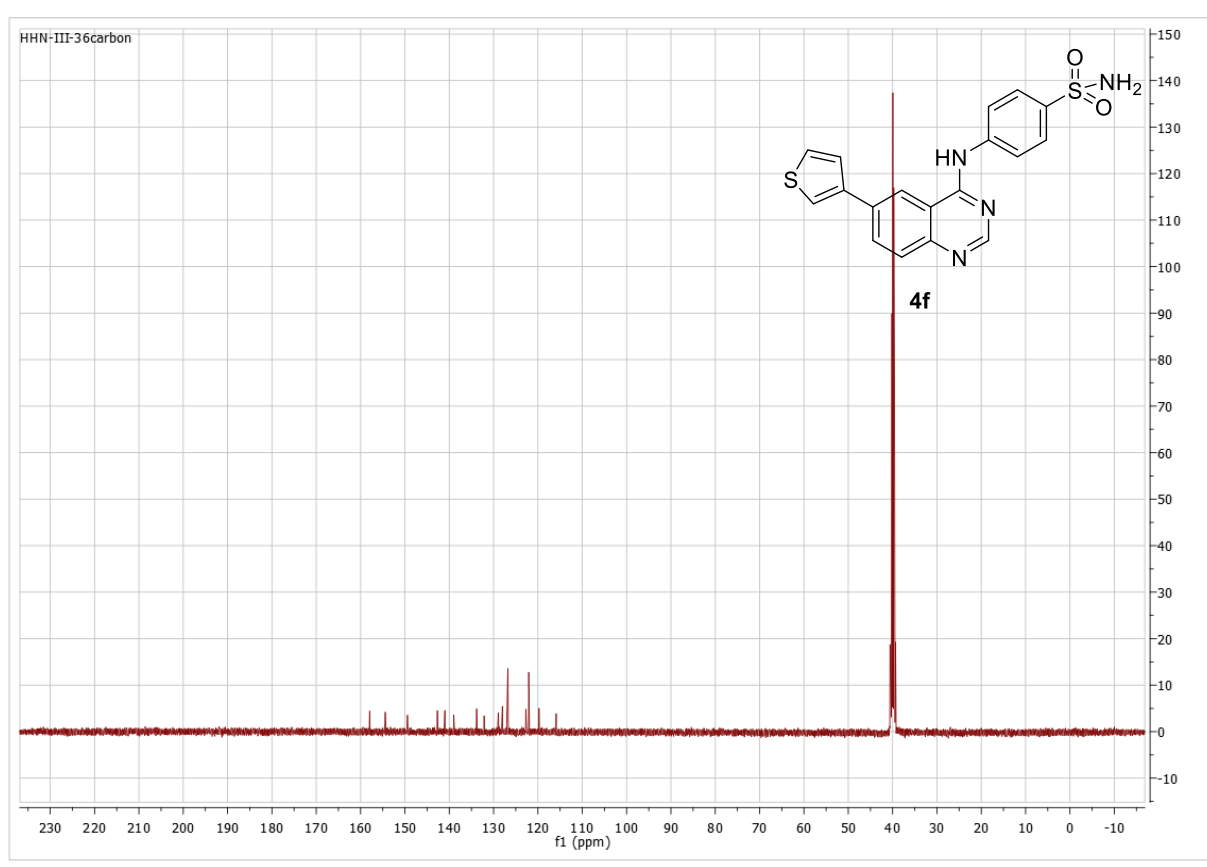

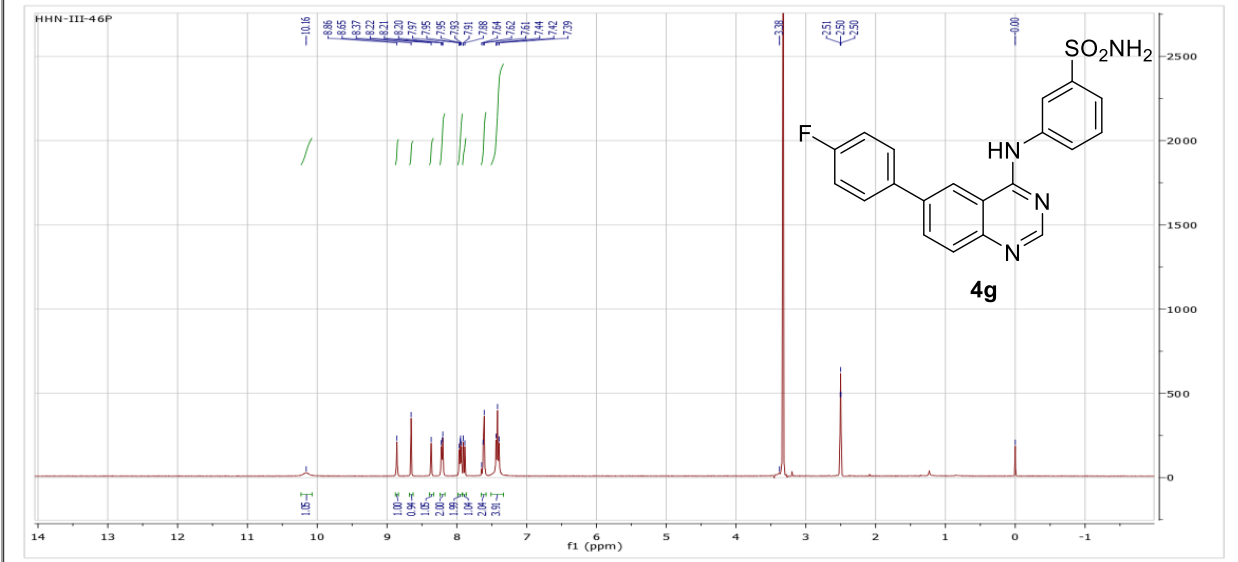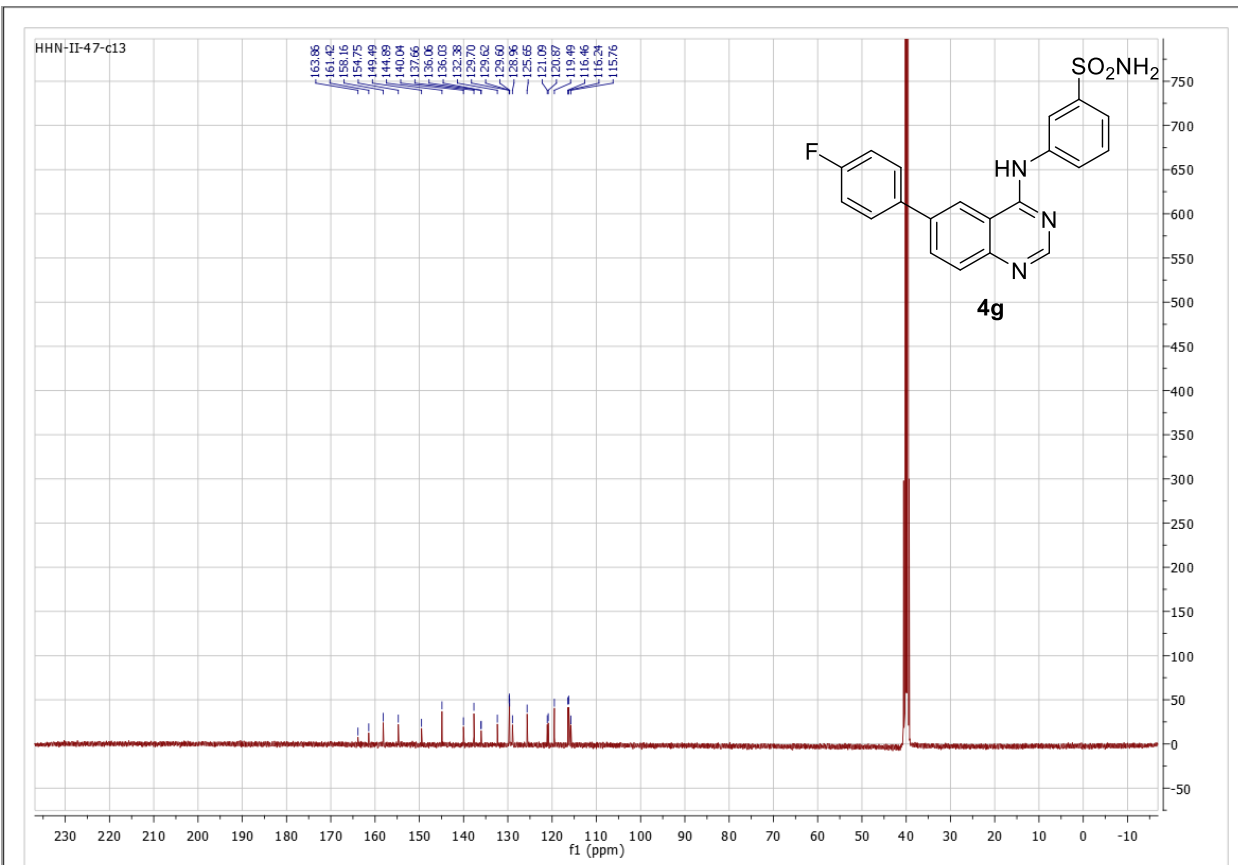

HHN-III-50P  
new experiment

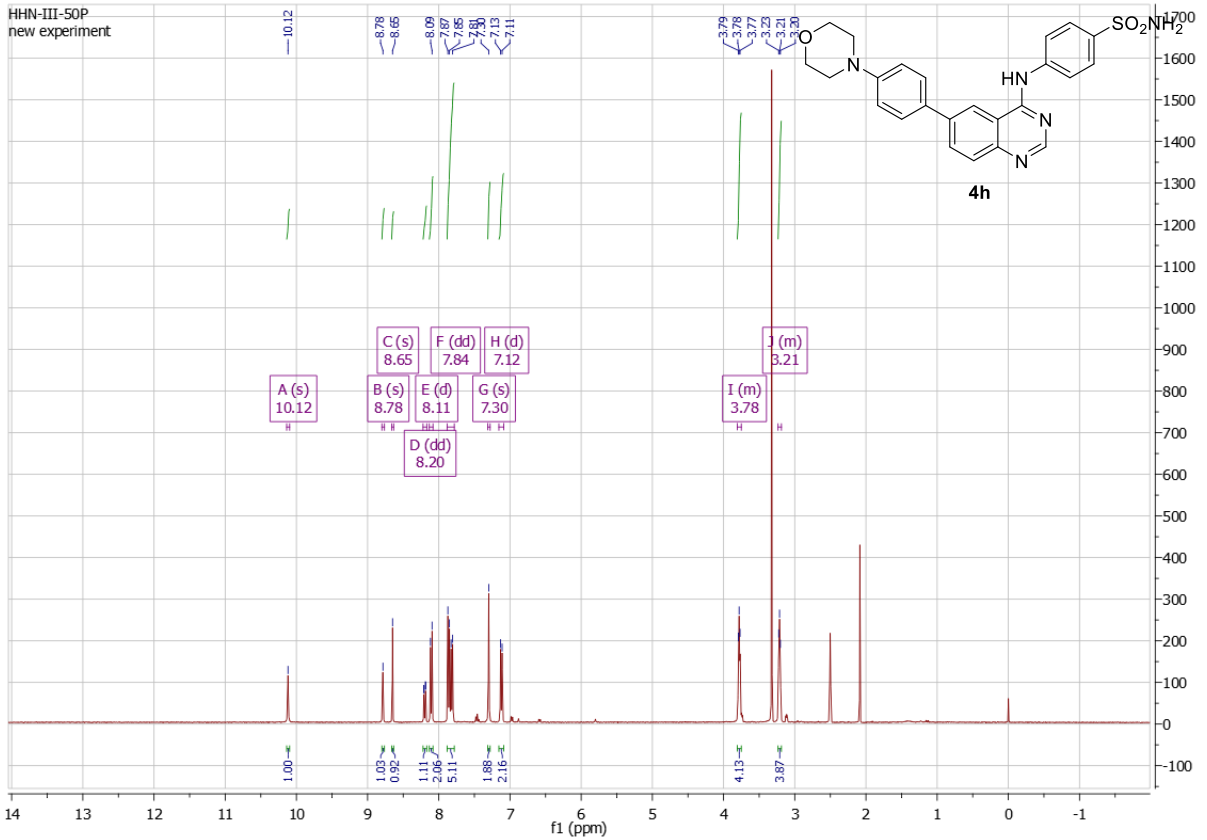

HHN-III-50-C13  
new experiment

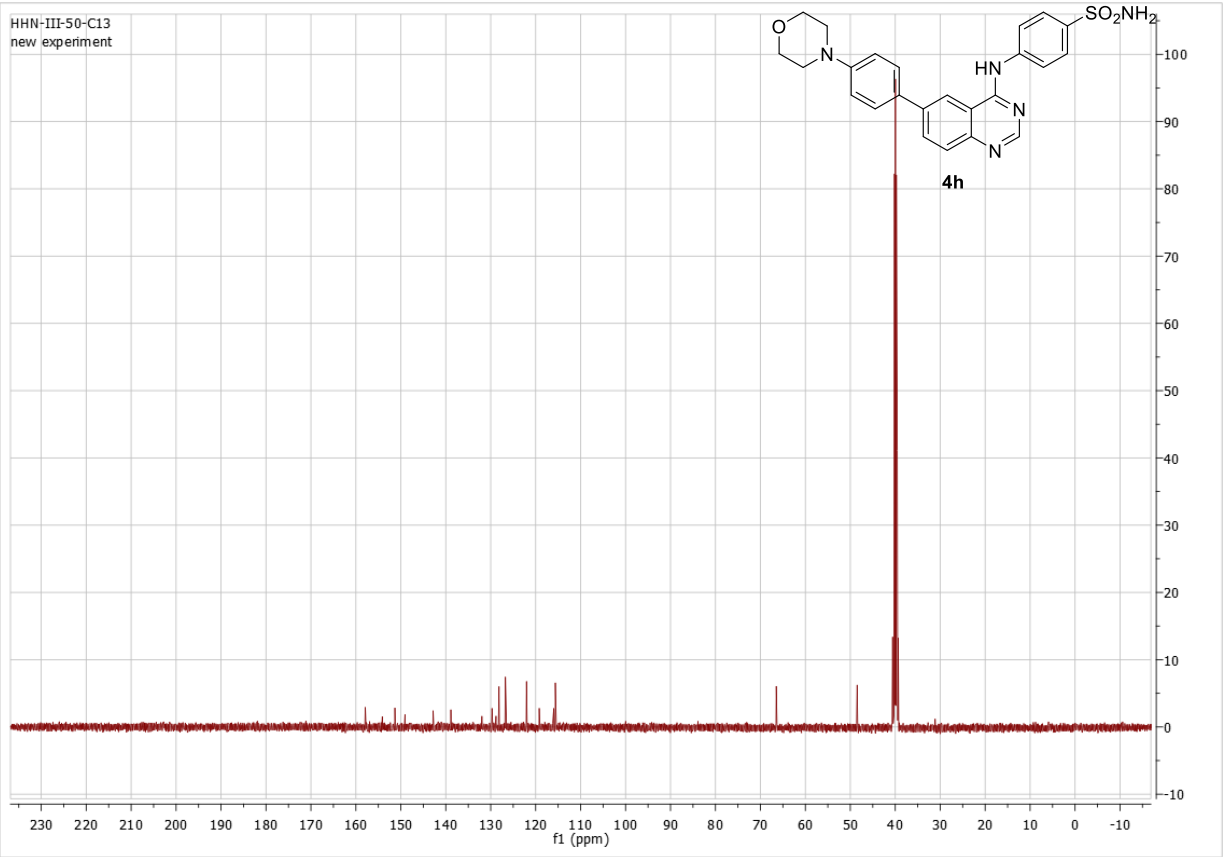

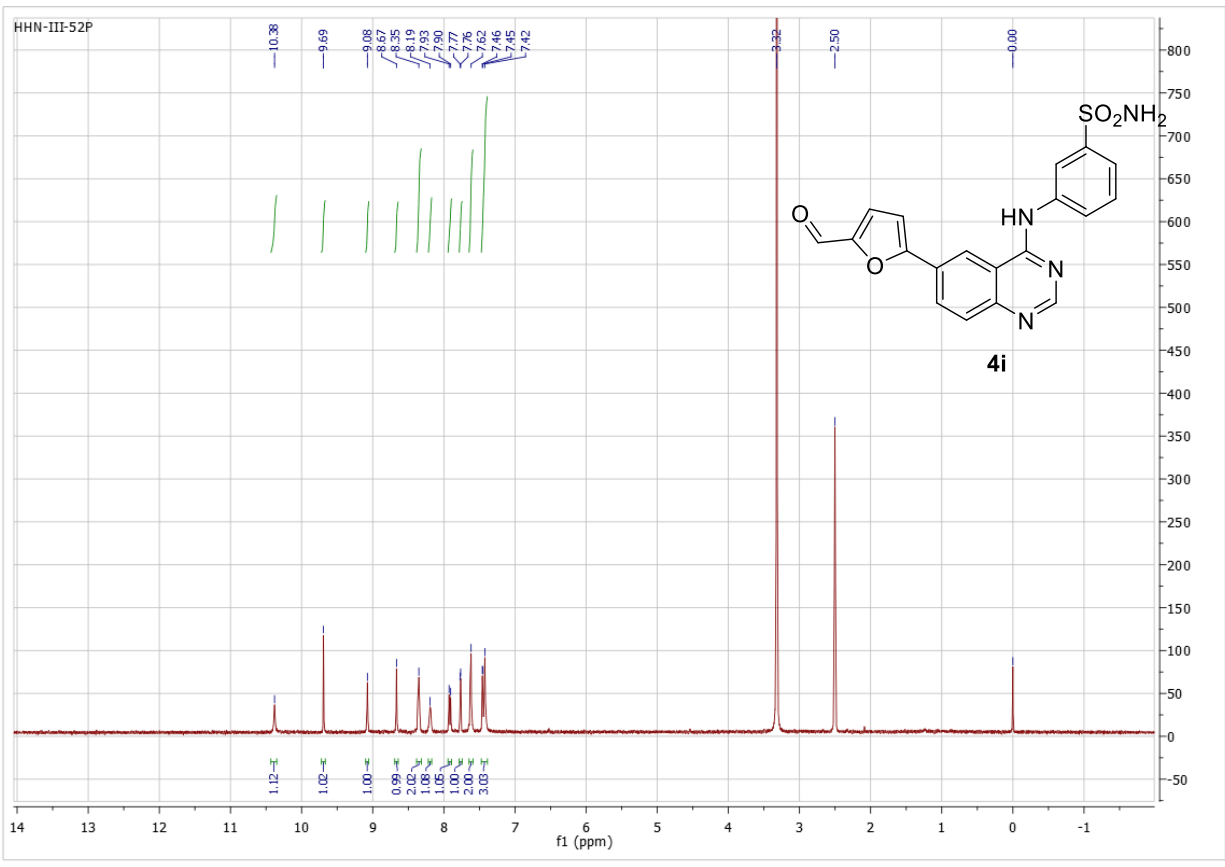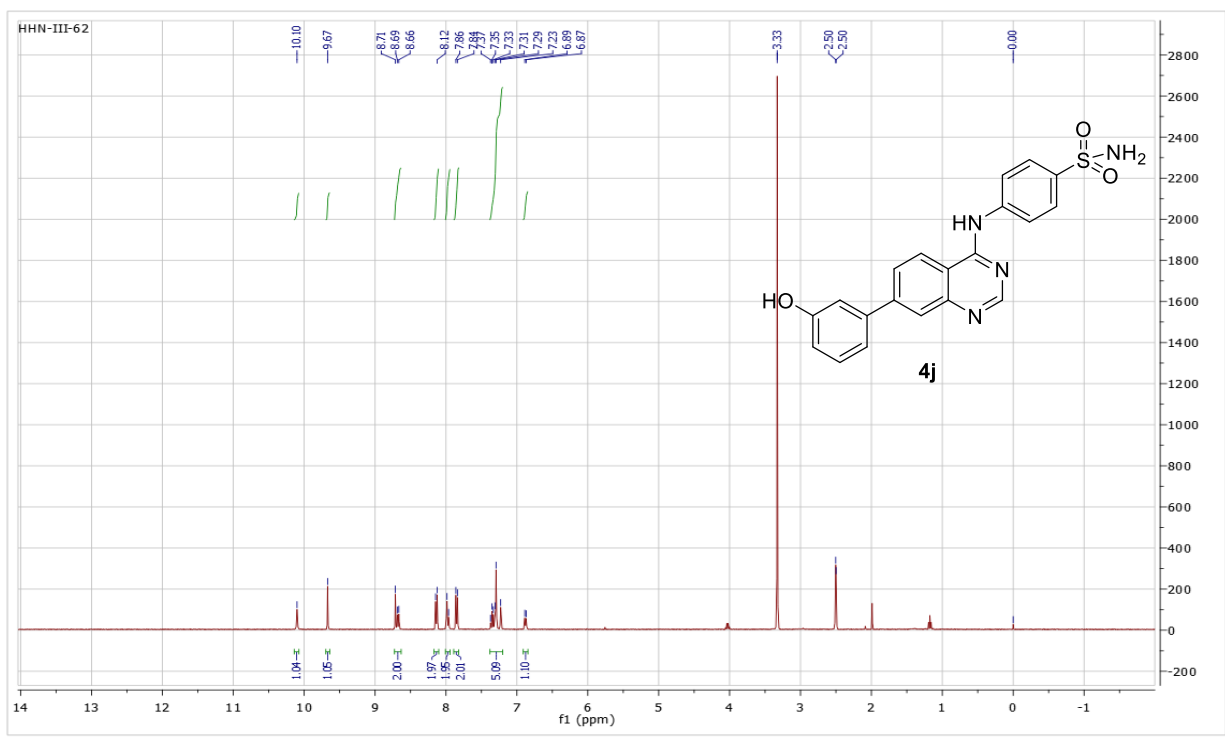

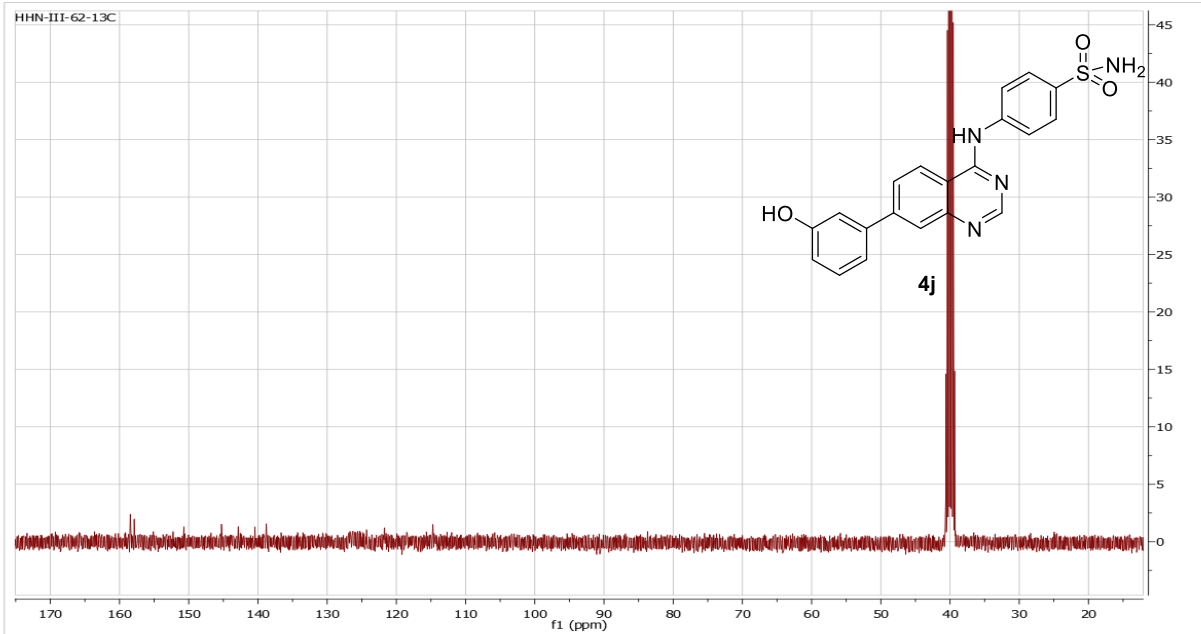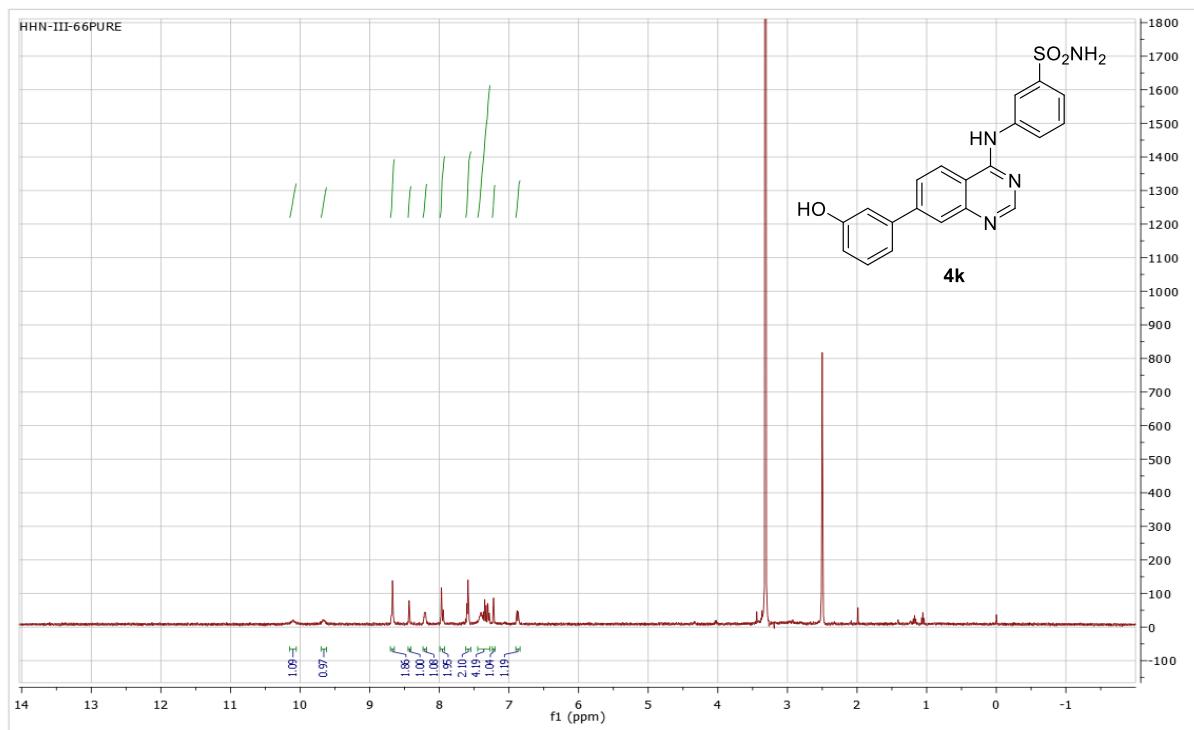

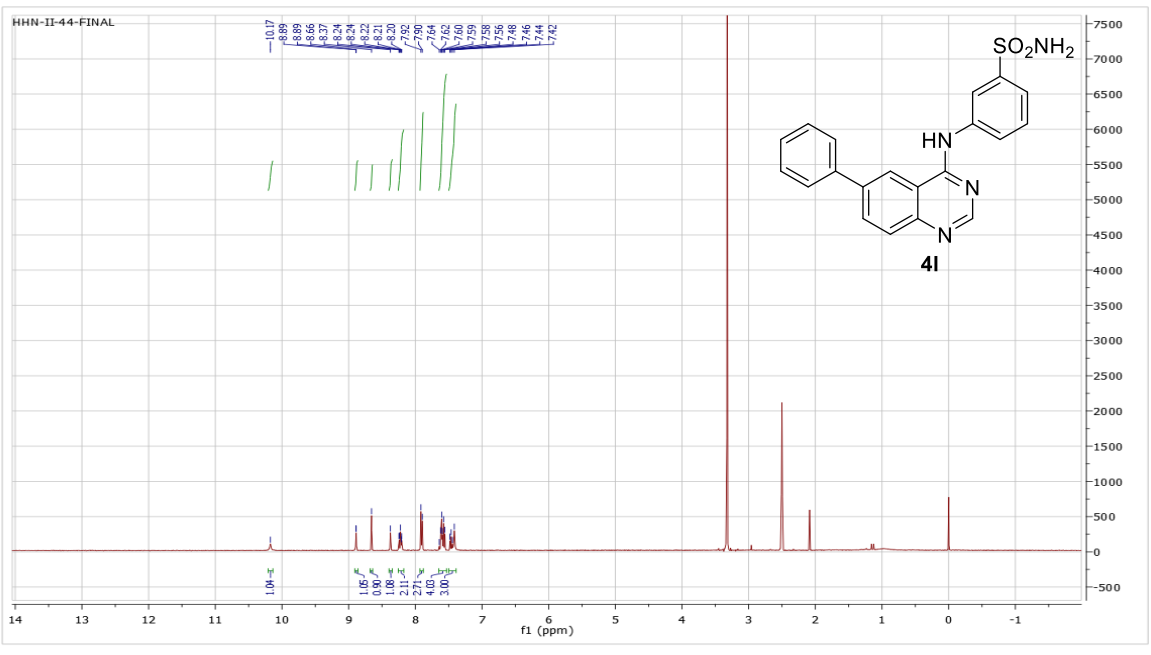



## 2. Representative HPLC purity data of the compounds 3a–d and 4a–f

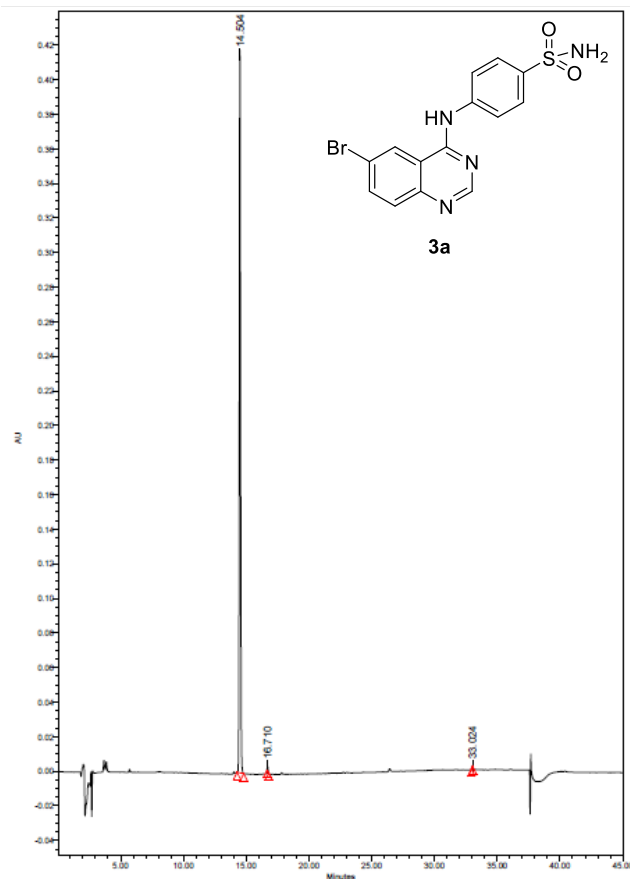

| Name | Retention Time (min) | Purity1 Angle | Purity1 Threshold | PDA Match1 Spect. Name | PDA Match1 Angle | PDA Match1 Threshold | PDA Match1 Lib. Name | Area ( $\mu V \cdot sec$ ) | % Area | Height ( $\mu V$ ) | Int Type | Amount | Units |
|------|----------------------|---------------|-------------------|------------------------|------------------|----------------------|----------------------|----------------------------|--------|--------------------|----------|--------|-------|
| 1    | 14.504               |               |                   |                        |                  |                      |                      | 2814904                    | 99.46  | 418996             | bb       |        |       |
| 2    | 16.710               |               |                   |                        |                  |                      |                      | 11749                      | 0.42   | 2587               | bb       |        |       |
| 3    | 33.024               |               |                   |                        |                  |                      |                      | 3664                       | 0.13   | 851                | bb       |        |       |

| Peak Type | Peak Codes |
|-----------|------------|
| 1 Unknown |            |
| 2 Unknown |            |
| 3 Unknown |            |

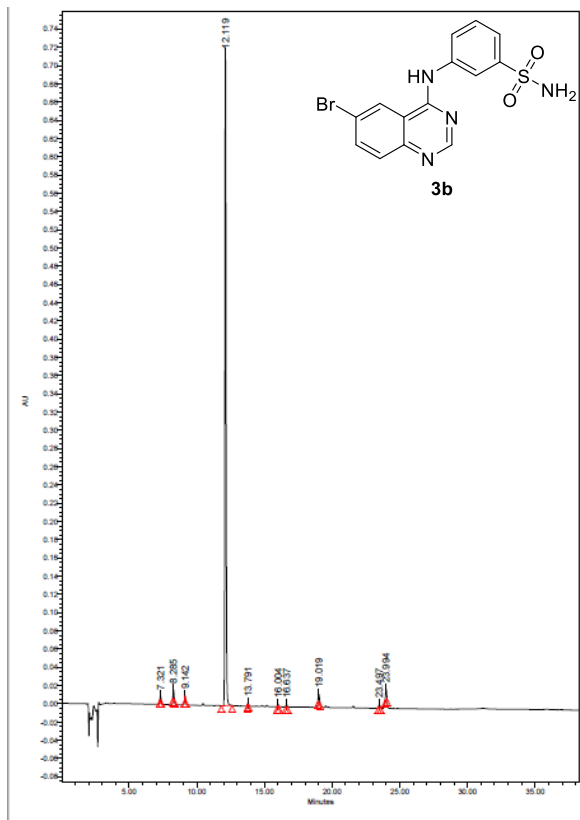

|    | Name | Retention Time (min) | Purity1 Angle | Purity1 Threshold | PDA Match1 Spect. Name | PDA Match1 Angle | PDA Match1 Threshold | PDA Match1 Lib. Name | Area ( $\mu\text{V}\cdot\text{sec}$ ) | % Area | Height ( $\mu\text{V}$ ) | Int Type | Amount | Units |
|----|------|----------------------|---------------|-------------------|------------------------|------------------|----------------------|----------------------|---------------------------------------|--------|--------------------------|----------|--------|-------|
| 1  |      | 7.321                |               |                   |                        |                  |                      |                      | 19355                                 | 0.44   | 4478                     | bb       |        |       |
| 2  |      | 8.285                |               |                   |                        |                  |                      |                      | 40947                                 | 0.93   | 9778                     | bb       |        |       |
| 3  |      | 9.142                |               |                   |                        |                  |                      |                      | 12329                                 | 0.28   | 3927                     | bb       |        |       |
| 4  |      | 12.119               |               |                   |                        |                  |                      |                      | 4200300                               | 95.11  | 719106                   | bb       |        |       |
| 5  |      | 13.791               |               |                   |                        |                  |                      |                      | 4753                                  | 0.11   | 1532                     | bb       |        |       |
| 6  |      | 16.004               |               |                   |                        |                  |                      |                      | 7963                                  | 0.18   | 1941                     | bb       |        |       |
| 7  |      | 16.637               |               |                   |                        |                  |                      |                      | 9446                                  | 0.21   | 1950                     | bb       |        |       |
| 8  |      | 19.019               |               |                   |                        |                  |                      |                      | 46554                                 | 1.05   | 8646                     | bb       |        |       |
| 9  |      | 23.497               |               |                   |                        |                  |                      |                      | 13240                                 | 0.30   | 2192                     | bb       |        |       |
| 10 |      | 23.994               |               |                   |                        |                  |                      |                      | 61570                                 | 1.39   | 11239                    | bb       |        |       |

|   | Peak Type | Peak Codes |
|---|-----------|------------|
| 1 | Unknown   |            |
| 2 | Unknown   |            |
| 3 | Unknown   |            |
| 4 | Unknown   |            |
| 5 | Unknown   |            |
| 6 | Unknown   |            |
| 7 | Unknown   |            |

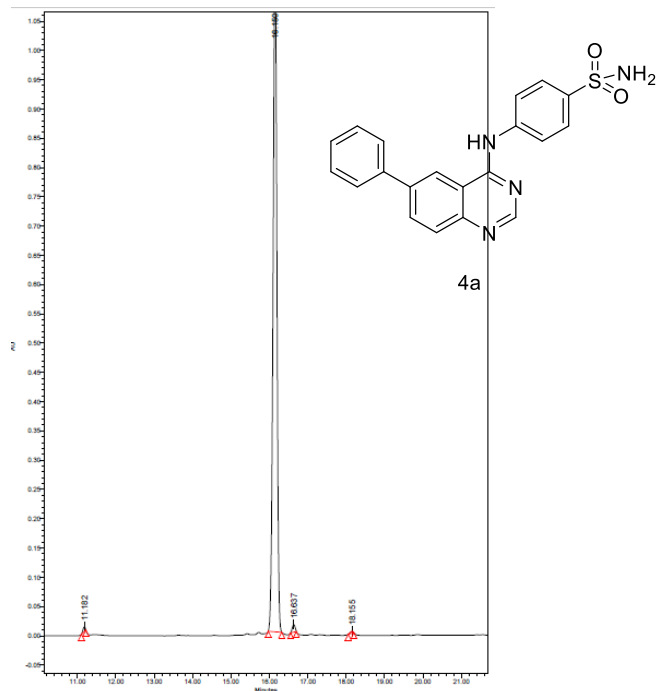

| Name | Retention Time (min) | Purity1 Angle | Purity1 Threshold | PDA Match1 Spect. Name | PDA Match1 Angle | PDA Match1 Threshold | PDA Match1 Lib. Name | Area (μV*sec) | % Area | Height (μV) | Int Type | Amount | Units |
|------|----------------------|---------------|-------------------|------------------------|------------------|----------------------|----------------------|---------------|--------|-------------|----------|--------|-------|
| 1    | 11.182               |               |                   |                        |                  |                      |                      | 32878         | 0.41   | 8074        | bb       |        |       |
| 2    | 16.150               |               |                   |                        |                  |                      |                      | 7916050       | 98.58  | 1157431     | bb       |        |       |
| 3    | 16.637               |               |                   |                        |                  |                      |                      | 64760         | 0.81   | 12718       | bb       |        |       |
| 4    | 18.155               |               |                   |                        |                  |                      |                      | 16762         | 0.21   | 3210        | bb       |        |       |

| Peak Type | Peak Codes |
|-----------|------------|
| 1 Unknown |            |
| 2 Unknown |            |
| 3 Unknown |            |
| 4 Unknown |            |

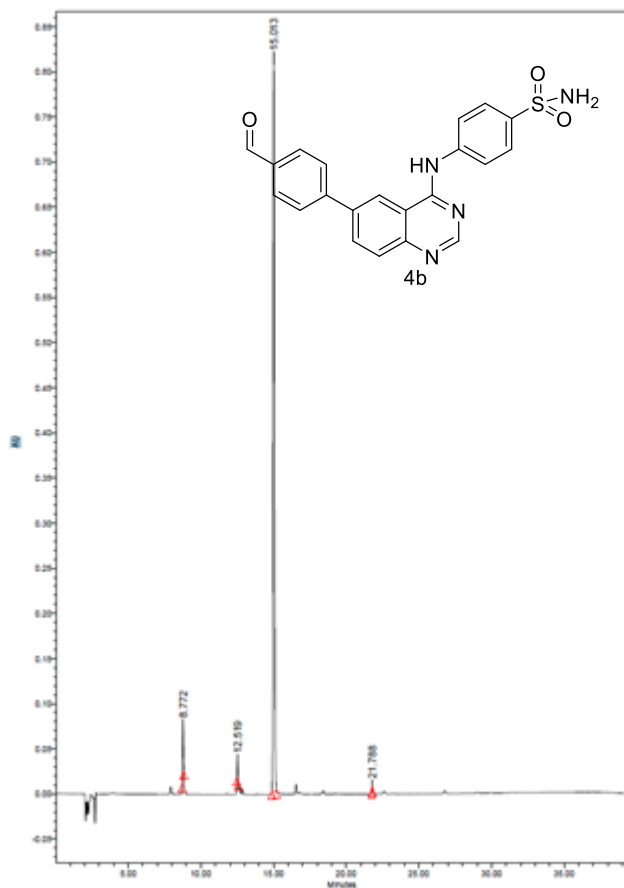

| Name | Retention Time (min) | Purity1 Angle | Purity1 Threshold | PDA Match1 Spect. Name | PDA Match1 Angle | PDA Match1 Threshold | PDA Match1 Lib. Name | Area ( $\mu\text{V}\cdot\text{sec}$ ) | % Area | Height ( $\mu\text{V}$ ) | Int Type | Amount | Units |
|------|----------------------|---------------|-------------------|------------------------|------------------|----------------------|----------------------|---------------------------------------|--------|--------------------------|----------|--------|-------|
| 1    | 8.772                |               |                   |                        |                  |                      |                      | 227402                                | 4.30   | 57247                    | bb       |        |       |
| 2    | 12.519               |               |                   |                        |                  |                      |                      | 76296                                 | 1.44   | 21075                    | bb       |        |       |
| 3    | 15.013               |               |                   |                        |                  |                      |                      | 4983721                               | 94.26  | 818680                   | bb       |        |       |

|   | Peak Type | Peak Codes |
|---|-----------|------------|
| 1 | Unknown   |            |
| 2 | Unknown   |            |
| 3 | Unknown   |            |

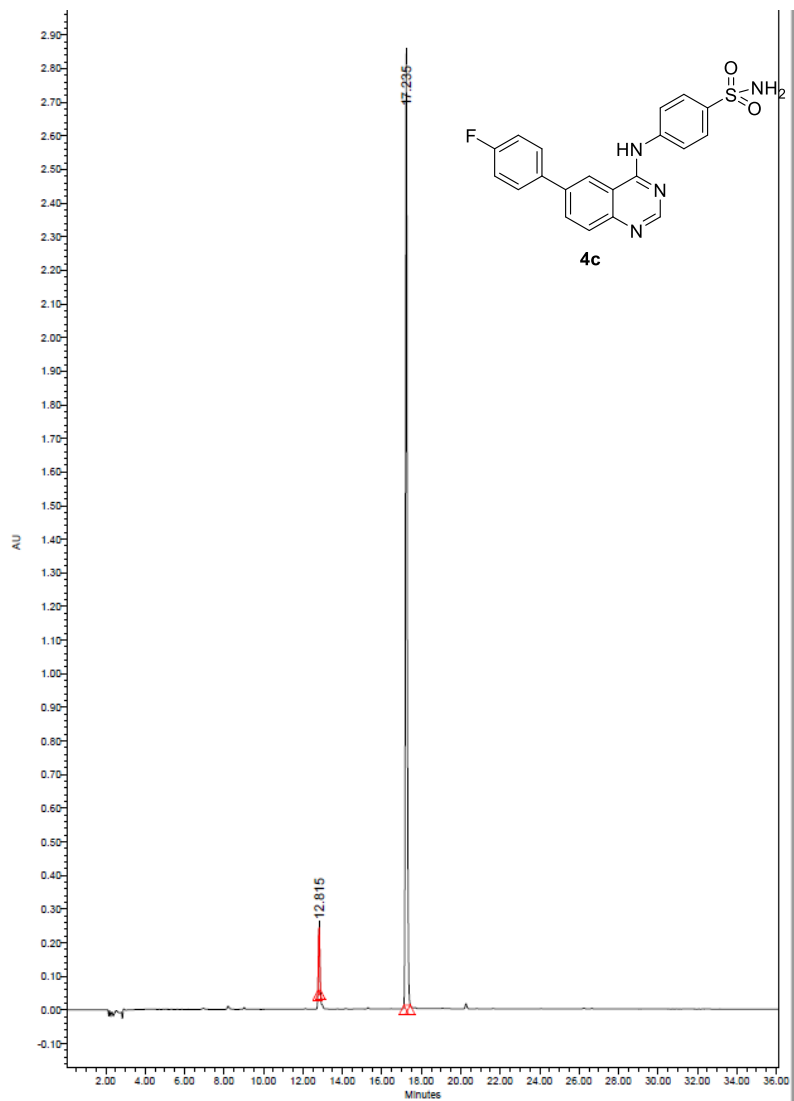

| Name | Retention Time (min) | Purity1 Angle | Purity1 Threshold | PDA Match1 Spect. Name | PDA Match1 Angle | PDA Match1 Threshold | PDA Match1 Lib. Name | Area ( $\mu V \cdot sec$ ) | % Area | Height ( $\mu V$ ) | Int Type | Amount | Units |
|------|----------------------|---------------|-------------------|------------------------|------------------|----------------------|----------------------|----------------------------|--------|--------------------|----------|--------|-------|
| 1    | 12.815               |               |                   |                        |                  |                      |                      | 830104                     | 4.81   | 185459             | bb       |        |       |
| 2    | 17.235               |               |                   |                        |                  |                      |                      | 16416914                   | 95.19  | 2801847            | bb       |        |       |

| Peak Type | Peak Codes |
|-----------|------------|
| 1 Unknown |            |
| 2 Unknown |            |

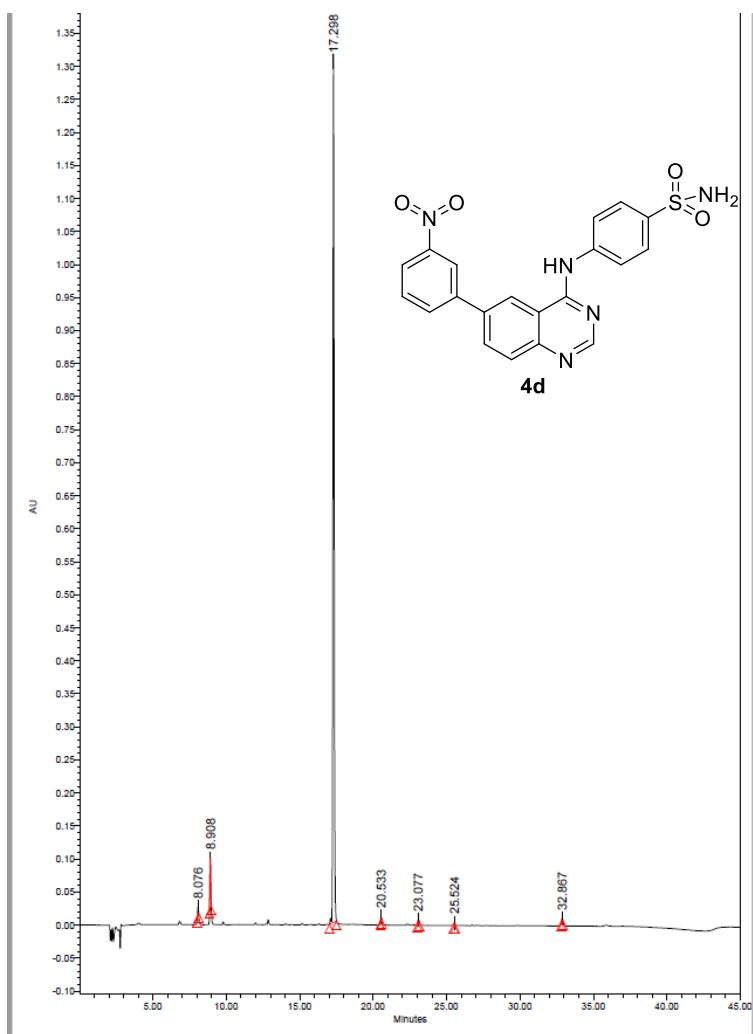

|   | Name | Retention Time (min) | Purity1 Angle | Purity1 Threshold | PDA Match1 Spect. Name | PDA Match1 Angle | PDA Match1 Threshold | PDA Match1 Lib. Name | Area (μV*sec) | % Area | Height (μV) | Int Type | Amount | Units |
|---|------|----------------------|---------------|-------------------|------------------------|------------------|----------------------|----------------------|---------------|--------|-------------|----------|--------|-------|
| 1 |      | 8.076                |               |                   |                        |                  |                      |                      | 47044         | 0.57   | 12618       | bb       |        |       |
| 2 |      | 8.908                |               |                   |                        |                  |                      |                      | 302062        | 3.68   | 75700       | bb       |        |       |
| 3 |      | 17.298               |               |                   |                        |                  |                      |                      | 7806171       | 95.08  | 1311111     | bb       |        |       |
| 4 |      | 20.533               |               |                   |                        |                  |                      |                      | 17098         | 0.21   | 5429        | bb       |        |       |
| 5 |      | 23.077               |               |                   |                        |                  |                      |                      | 16161         | 0.20   | 3734        | bb       |        |       |
| 6 |      | 25.524               |               |                   |                        |                  |                      |                      | 5168          | 0.06   | 1350        | bb       |        |       |
| 7 |      | 32.867               |               |                   |                        |                  |                      |                      | 16824         | 0.20   | 3804        | bb       |        |       |

|   | Peak Type | Peak Codes |
|---|-----------|------------|
| 1 | Unknown   |            |
| 2 | Unknown   |            |
| 3 | Unknown   |            |
| 4 | Unknown   |            |
| 5 | Unknown   |            |
| 6 | Unknown   |            |
| 7 | Unknown   |            |

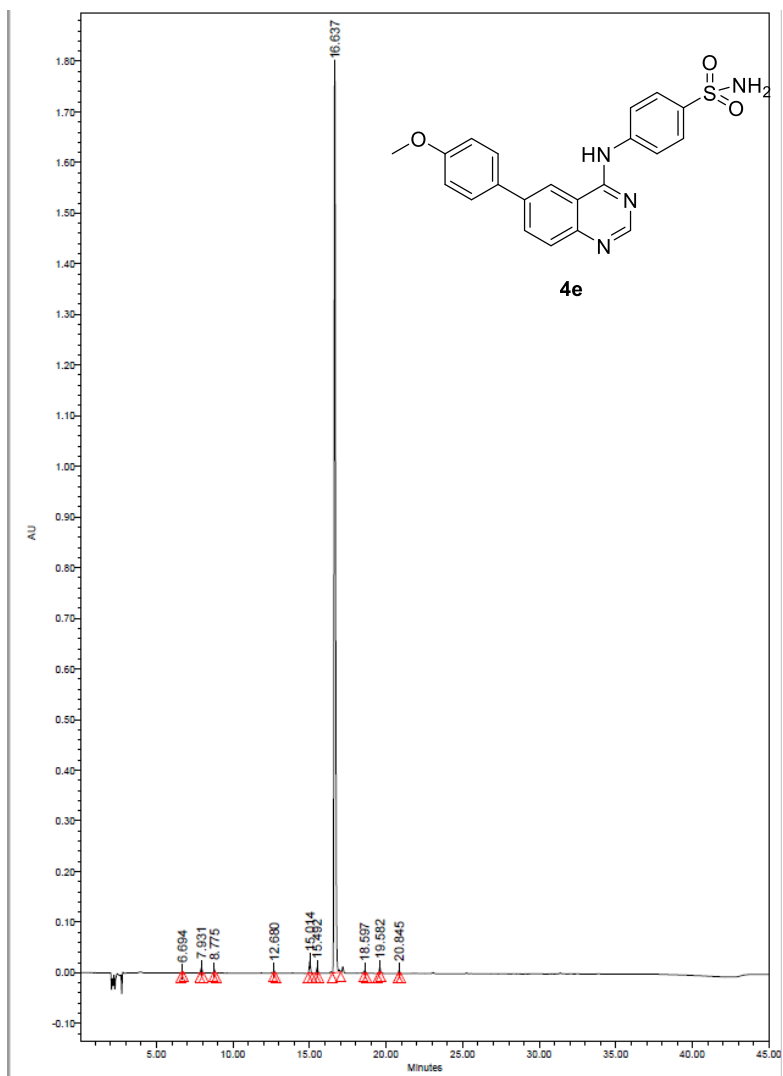

| Name | Retention Time (min) | Purity1 Angle | Purity1 Threshold | PDA Match1 Spect. Name | PDA Match1 Angle | PDA Match1 Threshold | PDA Match1 Lib. Name | Area (μV*sec) | % Area | Height (μV) | Int Type | Amount | Units |
|------|----------------------|---------------|-------------------|------------------------|------------------|----------------------|----------------------|---------------|--------|-------------|----------|--------|-------|
| 1    | 6.694                |               |                   |                        |                  |                      |                      | 14357         | 0.12   | 2244        | bb       |        |       |
| 2    | 7.931                |               |                   |                        |                  |                      |                      | 58103         | 0.47   | 9352        | bb       |        |       |
| 3    | 8.775                |               |                   |                        |                  |                      |                      | 26627         | 0.21   | 5630        | bb       |        |       |
| 4    | 12.680               |               |                   |                        |                  |                      |                      | 20602         | 0.17   | 4220        | bb       |        |       |
| 5    | 15.014               |               |                   |                        |                  |                      |                      | 144110        | 1.16   | 24188       | bb       |        |       |
| 6    | 15.492               |               |                   |                        |                  |                      |                      | 61469         | 0.49   | 11138       | bb       |        |       |
| 7    | 16.637               |               |                   |                        |                  |                      |                      | 12017479      | 96.57  | 1812810     | bb       |        |       |
| 8    | 18.597               |               |                   |                        |                  |                      |                      | 27416         | 0.22   | 4151        | bb       |        |       |
| 9    | 19.582               |               |                   |                        |                  |                      |                      | 44484         | 0.36   | 9451        | bb       |        |       |
| 10   | 20.845               |               |                   |                        |                  |                      |                      | 30110         | 0.24   | 5670        | bb       |        |       |

| Peak Type | Peak Codes |
|-----------|------------|
| 1         | Unknown    |
| 2         | Unknown    |
| 3         | Unknown    |
| 4         | Unknown    |
| 5         | Unknown    |
| 6         | Unknown    |
| 7         | Unknown    |

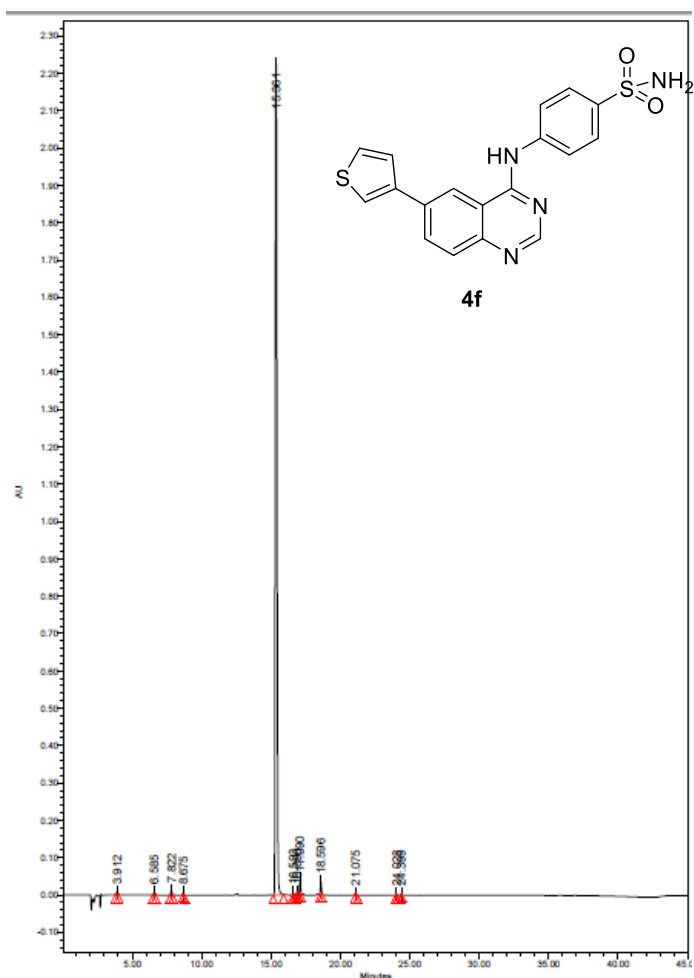

| Name | Retention Time (min) | Purity1 Angle | Purity1 Threshold | PDA Match1 Spect. Name | PDA Match1 Angle | PDA Match1 Threshold | PDA Match1 Lib. Name | Area (μV*sec) | % Area | Height (μV) | Int Type | Amount | Units |
|------|----------------------|---------------|-------------------|------------------------|------------------|----------------------|----------------------|---------------|--------|-------------|----------|--------|-------|
| 1    | 3.912                |               |                   |                        |                  |                      |                      | 38329         | 0.19   | 4362        | bb       |        |       |
| 2    | 6.585                |               |                   |                        |                  |                      |                      | 39898         | 0.19   | 5960        | bb       |        |       |
| 3    | 7.822                |               |                   |                        |                  |                      |                      | 74062         | 0.36   | 11982       | bb       |        |       |
| 4    | 8.675                |               |                   |                        |                  |                      |                      | 9762          | 0.05   | 2722        | bb       |        |       |
| 5    | 15.361               |               |                   |                        |                  |                      |                      | 19995834      | 97.18  | 2252689     | bb       |        |       |
| 6    | 16.593               |               |                   |                        |                  |                      |                      | 17410         | 0.08   | 4021        | bb       |        |       |
| 7    | 16.890               |               |                   |                        |                  |                      |                      | 21119         | 0.10   | 5240        | bb       |        |       |
| 8    | 17.090               |               |                   |                        |                  |                      |                      | 198514        | 0.96   | 37851       | bb       |        |       |
| 9    | 18.596               |               |                   |                        |                  |                      |                      | 160684        | 0.78   | 30903       | bb       |        |       |
| 10   | 21.075               |               |                   |                        |                  |                      |                      | 8154          | 0.04   | 1953        | bb       |        |       |
| 11   | 24.028               |               |                   |                        |                  |                      |                      | 9243          | 0.04   | 1986        | bb       |        |       |
| 12   | 24.399               |               |                   |                        |                  |                      |                      | 3054          | 0.01   | 1144        | bb       |        |       |

| Peak Type | Peak Codes |
|-----------|------------|
| 1 Unknown |            |
| 2 Unknown |            |
| 3 Unknown |            |
| 4 Unknown |            |
| 5 Unknown |            |



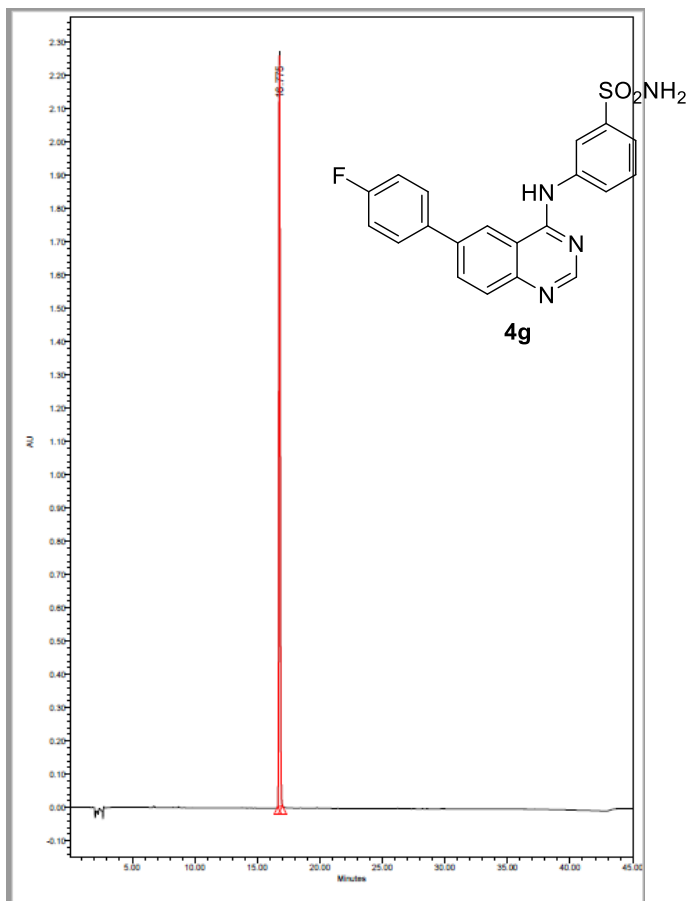

|   | Name | Retention Time (min) | Purity1 Angle | Purity1 Threshold | PDA Match1 Spect. Name | PDA Match1 Angle | PDA Match1 Threshold | PDA Match1 Lib. Name | Area (μV*sec) | % Area | Height (μV) | Int Type | Amount | Units |
|---|------|----------------------|---------------|-------------------|------------------------|------------------|----------------------|----------------------|---------------|--------|-------------|----------|--------|-------|
| 1 |      | 16.775               |               |                   |                        |                  |                      |                      | 16022791      | 100.00 | 2262610     | bb       |        |       |

|   | Peak Type | Peak Codes |
|---|-----------|------------|
| 1 | Unknown   |            |

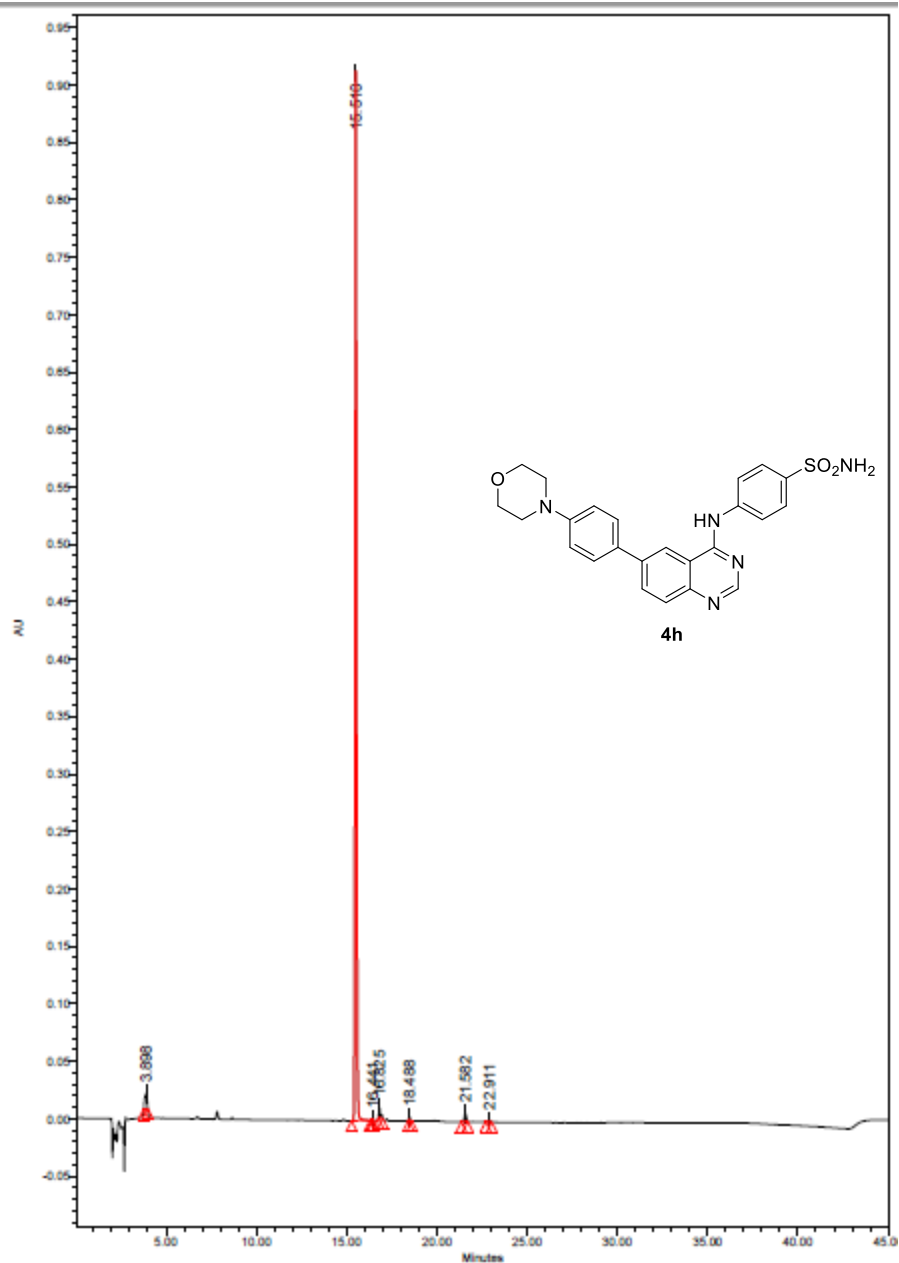

| Name | Retention Time (min) | Purity1 Angle | Purity1 Threshold | PDA Match1 Spect. Name | PDA Match1 Angle | PDA Match1 Threshold | PDA Match1 Lib. Name | Area ( $\mu\text{V} \cdot \text{sec}$ ) | % Area | Height ( $\mu\text{V}$ ) | Int Type | Amount | Units |
|------|----------------------|---------------|-------------------|------------------------|------------------|----------------------|----------------------|-----------------------------------------|--------|--------------------------|----------|--------|-------|
| 1    | 3.898                |               |                   |                        |                  |                      |                      | 122192                                  | 2.23   | 13150                    | bb       |        |       |
| 2    | 15.510               |               |                   |                        |                  |                      |                      | 5214400                                 | 95.27  | 905048                   | bb       |        |       |
| 3    | 16.441               |               |                   |                        |                  |                      |                      | 3167                                    | 0.06   | 867                      | bb       |        |       |
| 4    | 16.825               |               |                   |                        |                  |                      |                      | 54410                                   | 0.99   | 8926                     | bb       |        |       |
| 5    | 18.488               |               |                   |                        |                  |                      |                      | 14350                                   | 0.26   | 2914                     | bb       |        |       |
| 6    | 21.582               |               |                   |                        |                  |                      |                      | 52919                                   | 0.97   | 6797                     | bb       |        |       |
| 7    | 22.911               |               |                   |                        |                  |                      |                      | 11878                                   | 0.22   | 1330                     | bb       |        |       |

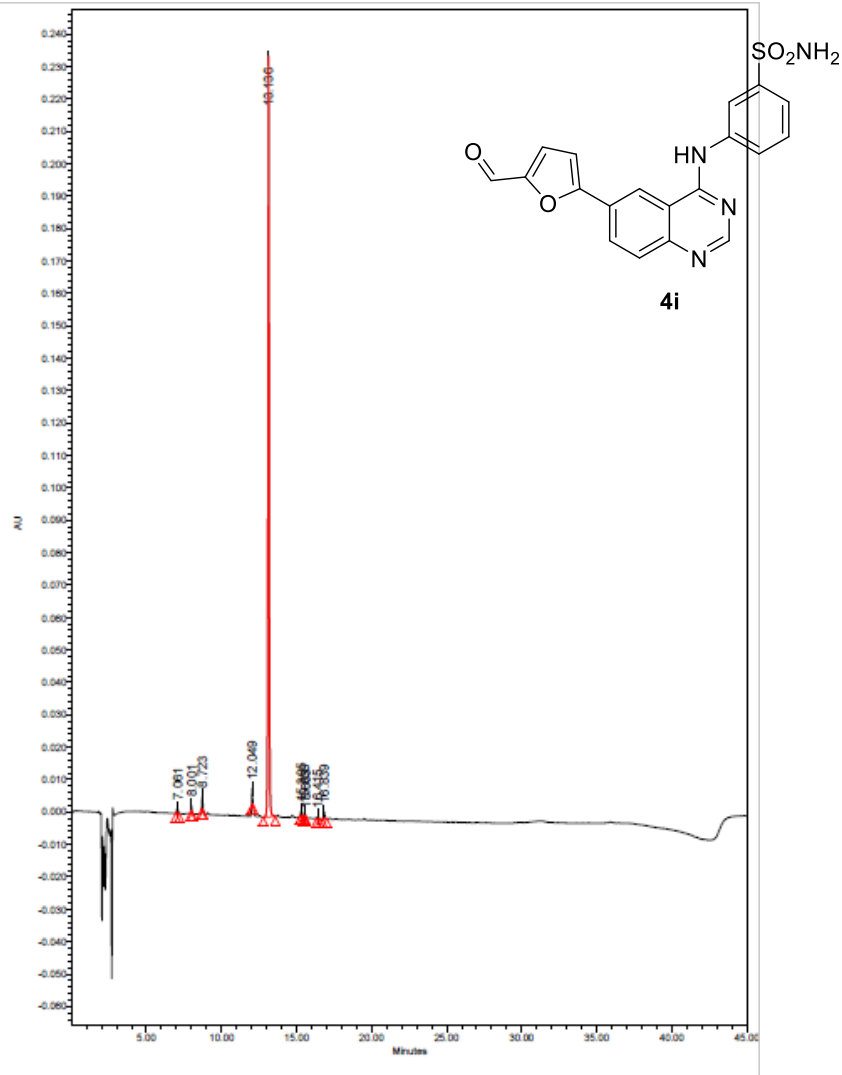

| Name | Retention Time (min) | Purity1 Angle | Purity1 Threshold | PDA Match1 Spect. Name | PDA Match1 Angle | PDA Match1 Threshold | PDA Match1 Lib. Name | Area (μV*sec) | % Area | Height (μV) | Int Type | Amount | Units |
|------|----------------------|---------------|-------------------|------------------------|------------------|----------------------|----------------------|---------------|--------|-------------|----------|--------|-------|
| 1    | 7.061                |               |                   |                        |                  |                      |                      | 10398         | 0.74   | 1388        | bb       |        |       |
| 2    | 8.001                |               |                   |                        |                  |                      |                      | 6112          | 0.44   | 1742        | bb       |        |       |
| 3    | 8.723                |               |                   |                        |                  |                      |                      | 16055         | 1.15   | 4045        | bb       |        |       |
| 4    | 12.049               |               |                   |                        |                  |                      |                      | 17560         | 1.26   | 5014        | bb       |        |       |
| 5    | 13.136               |               |                   |                        |                  |                      |                      | 1329898       | 95.09  | 232034      | bb       |        |       |
| 6    | 15.305               |               |                   |                        |                  |                      |                      | 6206          | 0.44   | 1452        | bb       |        |       |
| 7    | 15.538               |               |                   |                        |                  |                      |                      | 4342          | 0.31   | 1215        | bb       |        |       |
| 8    | 15.603               |               |                   |                        |                  |                      |                      | 0             | 0.00   | 0           | tt       |        |       |
| 9    | 16.415               |               |                   |                        |                  |                      |                      | 1704          | 0.12   | 343         | bb       |        |       |
| 10   | 16.839               |               |                   |                        |                  |                      |                      | 6239          | 0.45   | 1554        | bb       |        |       |

| Peak Type | Peak Codes  |
|-----------|-------------|
| 1         | Unknown     |
| 2         | Unknown     |
| 3         | Unknown     |
| 4         | Unknown     |
| 5         | Unknown     |
| 6         | Unknown     |
| 7         | Unknown     |
| 8         | Unknown 105 |
| 9         | Unknown     |
| 10        | Unknown     |

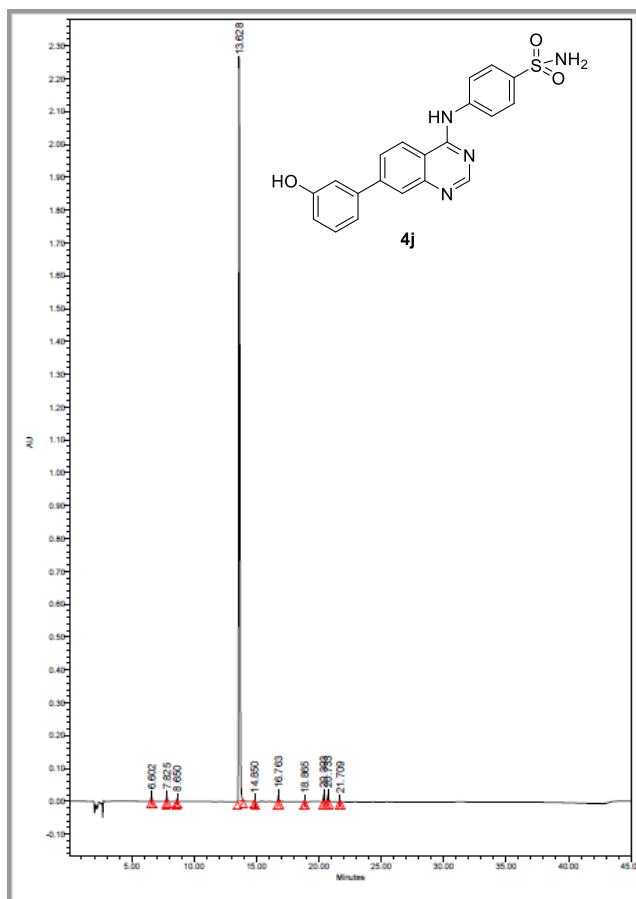

| Name | Retention Time (min) | Purity1 Angle | Purity1 Threshold | PDA Match1 Spect. Name | PDA Match1 Angle | PDA Match1 Threshold | PDA Match1 Lib. Name | Area (μV*sec) | % Area | Height (μV) | Int Type | Amount | Units |
|------|----------------------|---------------|-------------------|------------------------|------------------|----------------------|----------------------|---------------|--------|-------------|----------|--------|-------|
| 1    | 6.602                |               |                   |                        |                  |                      |                      | 61572         | 0.40   | 10046       | bb       |        |       |
| 2    | 7.825                |               |                   |                        |                  |                      |                      | 61218         | 0.39   | 11418       | bb       |        |       |
| 3    | 8.650                |               |                   |                        |                  |                      |                      | 24893         | 0.16   | 5862        | bb       |        |       |
| 4    | 13.628               |               |                   |                        |                  |                      |                      | 15014404      | 96.82  | 2285484     | bb       |        |       |
| 5    | 14.850               |               |                   |                        |                  |                      |                      | 6524          | 0.04   | 1936        | bb       |        |       |
| 6    | 16.763               |               |                   |                        |                  |                      |                      | 89713         | 0.58   | 17181       | bb       |        |       |
| 7    | 18.865               |               |                   |                        |                  |                      |                      | 9345          | 0.06   | 2133        | bb       |        |       |
| 8    | 20.393               |               |                   |                        |                  |                      |                      | 107303        | 0.69   | 19431       | bb       |        |       |
| 9    | 20.733               |               |                   |                        |                  |                      |                      | 116863        | 0.75   | 19392       | bb       |        |       |
| 10   | 21.709               |               |                   |                        |                  |                      |                      | 16226         | 0.10   | 3145        | bb       |        |       |

| Peak Type | Peak Codes |
|-----------|------------|
| 1         | Unknown    |
| 2         | Unknown    |
| 3         | Unknown    |
| 4         | Unknown    |
| 5         | Unknown    |
| 6         | Unknown    |
| 7         | Unknown    |
| 8         | Unknown    |
| 9         | Unknown    |
| 10        | Unknown    |

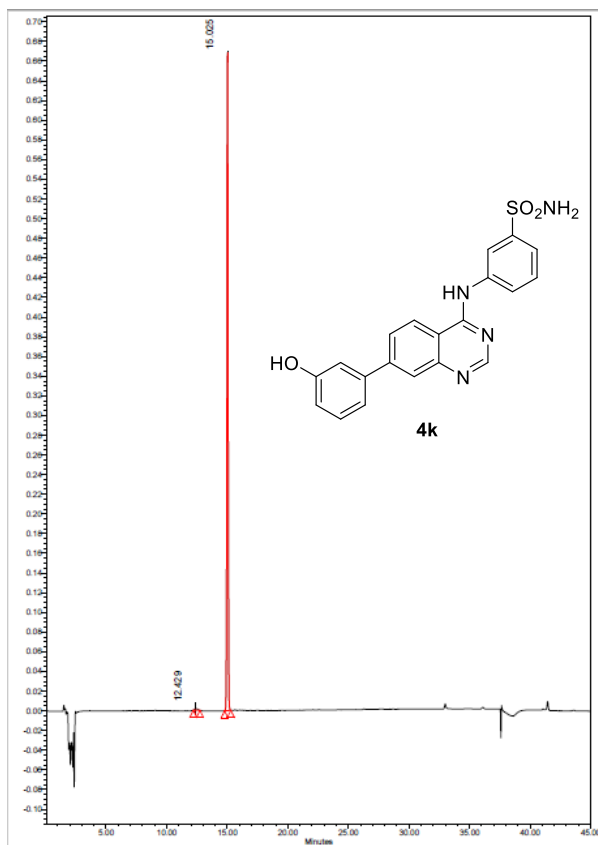

| Name | Retention Time (min) | Purity1 Angle | Purity1 Threshold | PDA Match1 Spect. Name | PDA Match1 Angle | PDA Match1 Threshold | PDA Match1 Lib. Name | Area (μV*sec) | % Area | Height (μV) | Int Type | Amount | Units |
|------|----------------------|---------------|-------------------|------------------------|------------------|----------------------|----------------------|---------------|--------|-------------|----------|--------|-------|
| 1    | 12.429               |               |                   |                        |                  |                      |                      | 30824         | 0.68   | 1764        | bb       |        |       |
| 2    | 15.025               |               |                   |                        |                  |                      |                      | 4493452       | 99.32  | 671385      | bb       |        |       |

| ts | Peak Type | Peak Codes |
|----|-----------|------------|
| 1  | Unknown   |            |
| 2  | Unknown   |            |

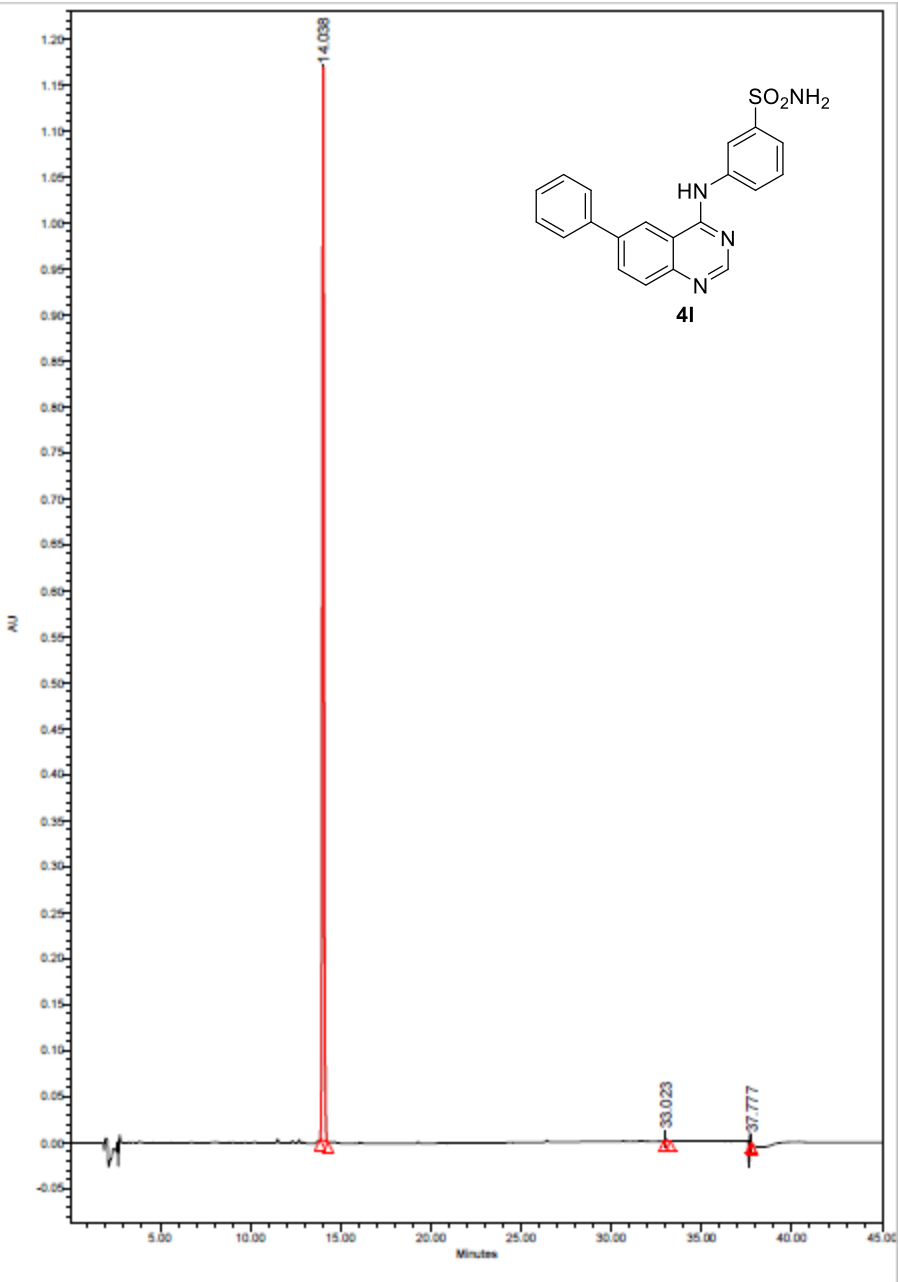

| Name | Retention Time (min) | Purity1 Angle | Purity1 Threshold | PDA Match1 Spect. Name | PDA Match1 Angle | PDA Match1 Threshold | PDA Match1 Lib. Name | Area ( $\mu\text{V}\cdot\text{sec}$ ) | % Area | Height ( $\mu\text{V}$ ) | Int Type | Amount | Units |
|------|----------------------|---------------|-------------------|------------------------|------------------|----------------------|----------------------|---------------------------------------|--------|--------------------------|----------|--------|-------|
| 1    | 14.038               |               |                   |                        |                  |                      |                      | 7876666                               | 99.81  | 1168263                  | bb       |        |       |
| 2    | 33.023               |               |                   |                        |                  |                      |                      | 14625                                 | 0.19   | 1987                     | bb       |        |       |
| 3    | 37.777               |               |                   |                        |                  |                      |                      | 563                                   | 0.01   | -225                     | bb       |        |       |

| Peak Type | Peak Codes |
|-----------|------------|
| 1 Unknown |            |
| 2 Unknown |            |
| 3 Unknown | I08        |

### 3. Representative HRMS data of the compounds 3a-d and 4a-f

HHN-III-25 75 (1.327)

1: TOF MS ES+  
2.44e5

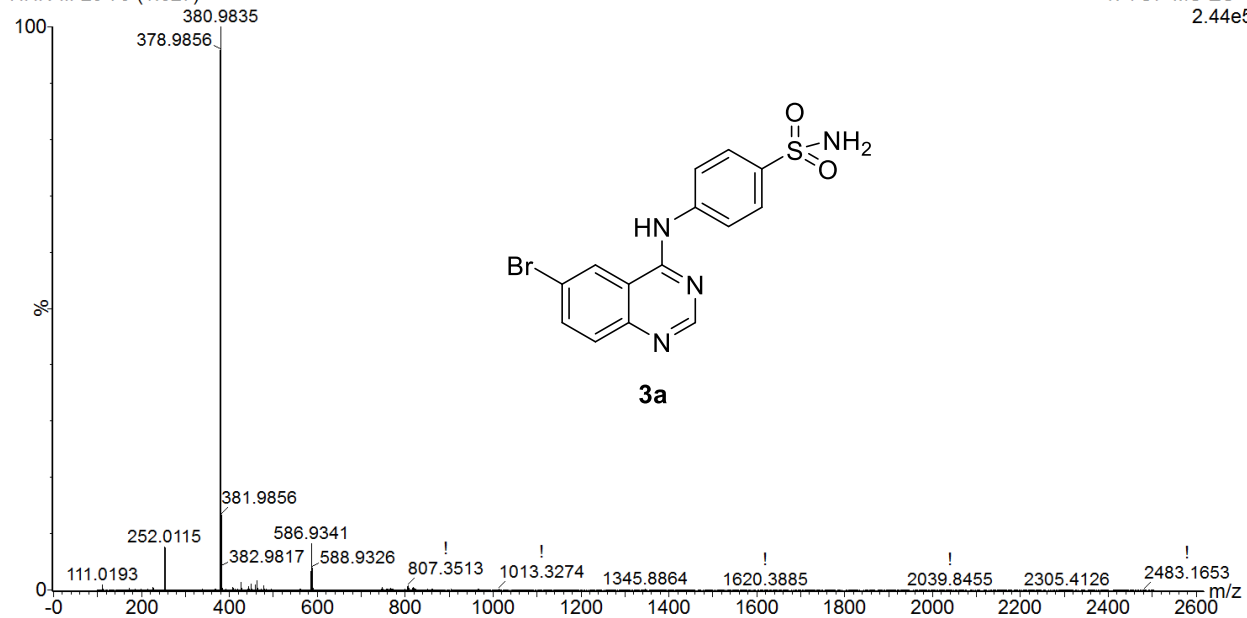

HHN-III-43 73 (1.294)

1: TOF MS ES+  
1.51e5

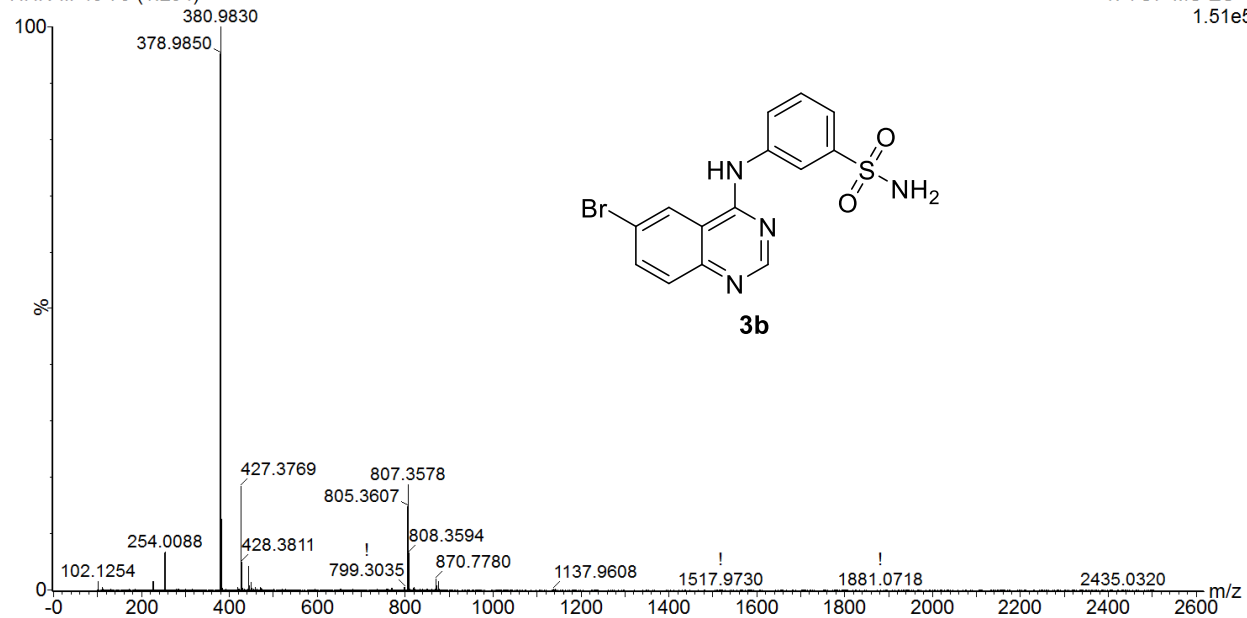

HHN-III-26 69 (1.224)

1: TOF MS ES+  
1.66e6

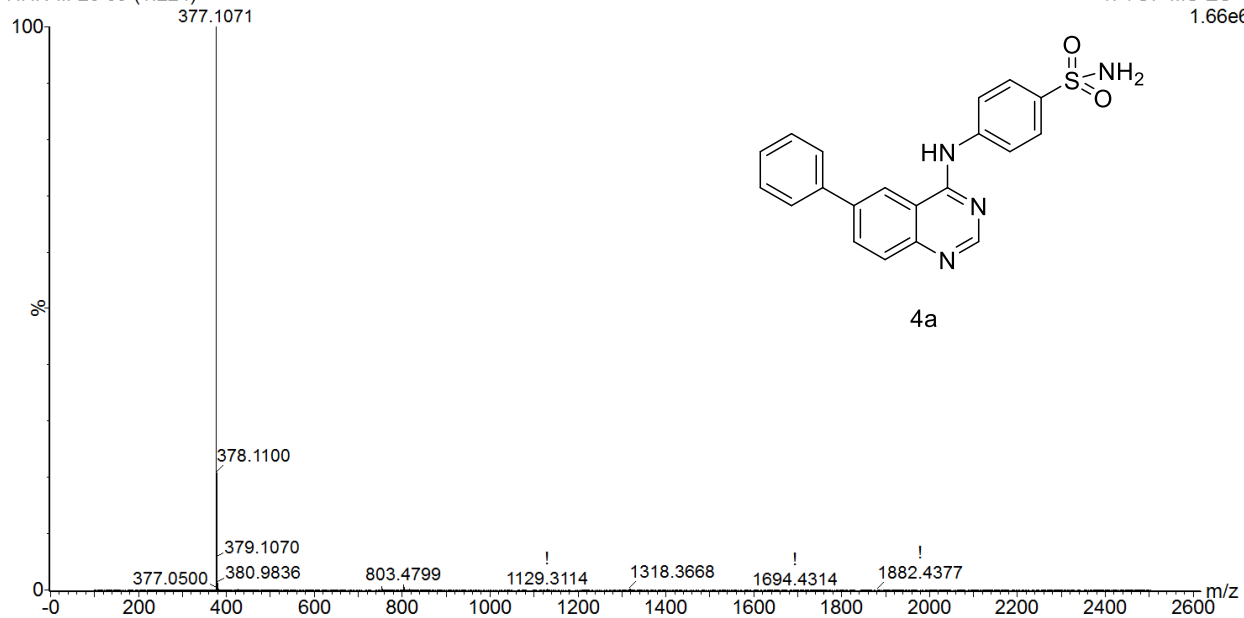

HHN-III-32 67 (1.190)

1: TOF MS ES+  
9.00e5

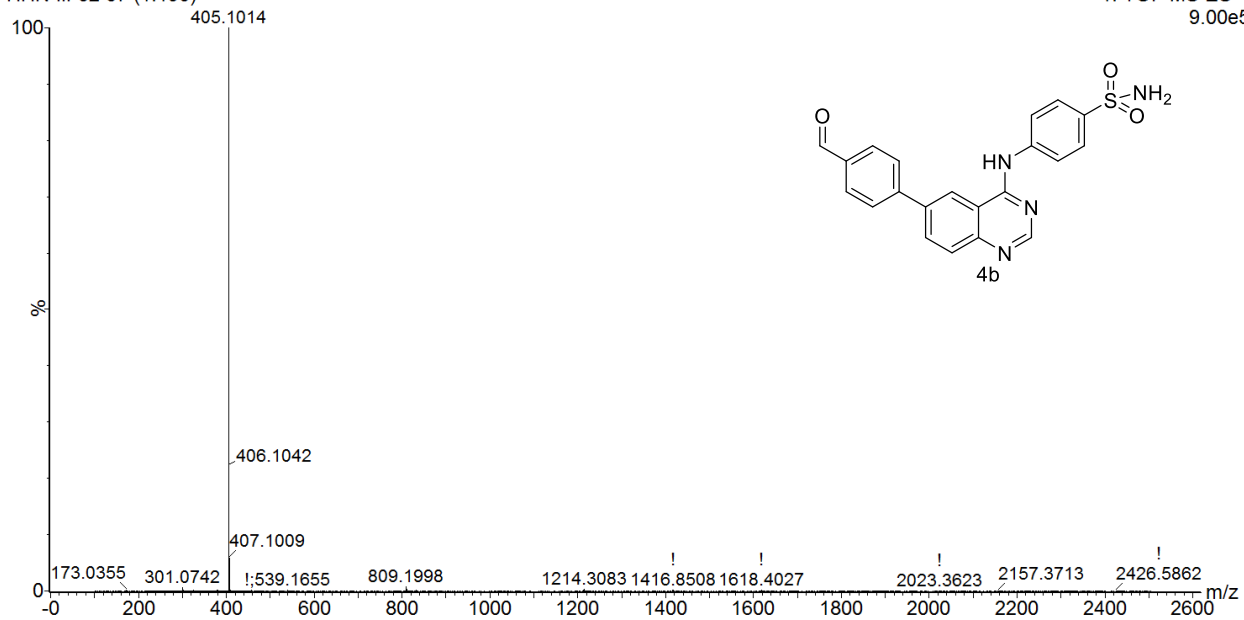



HHN-III-34 68 (1.207)

1: TOF MS ES+  
5.63e5

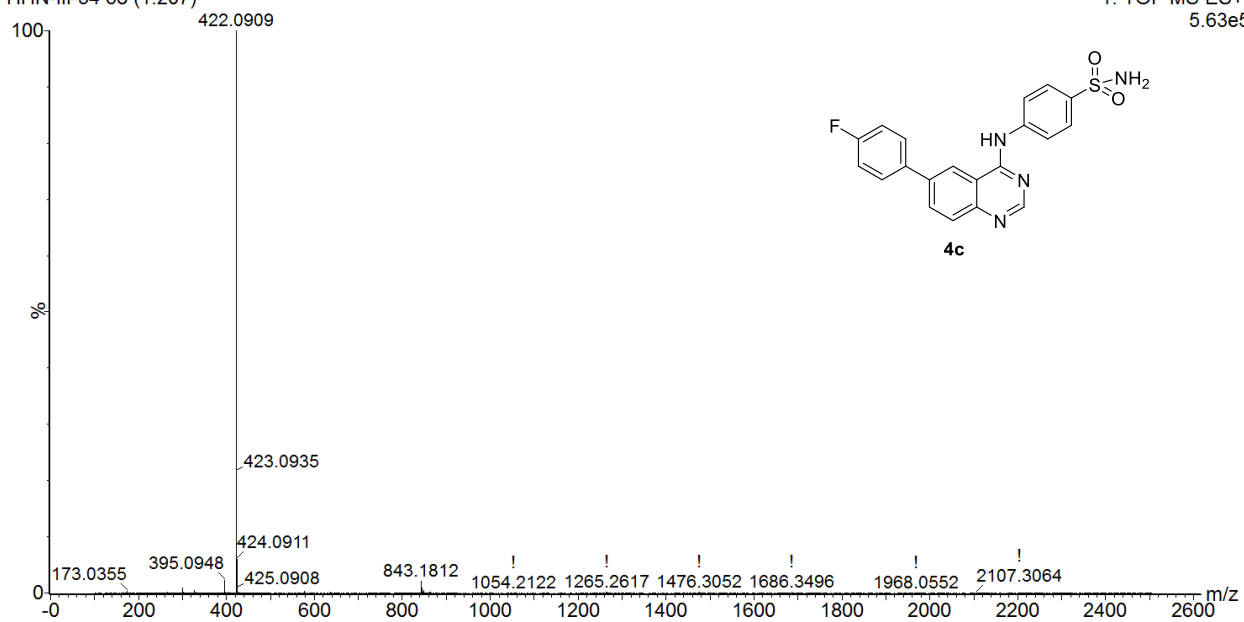

HHN-III-34 68 (1.207)

1: TOF MS ES+  
5.63e5

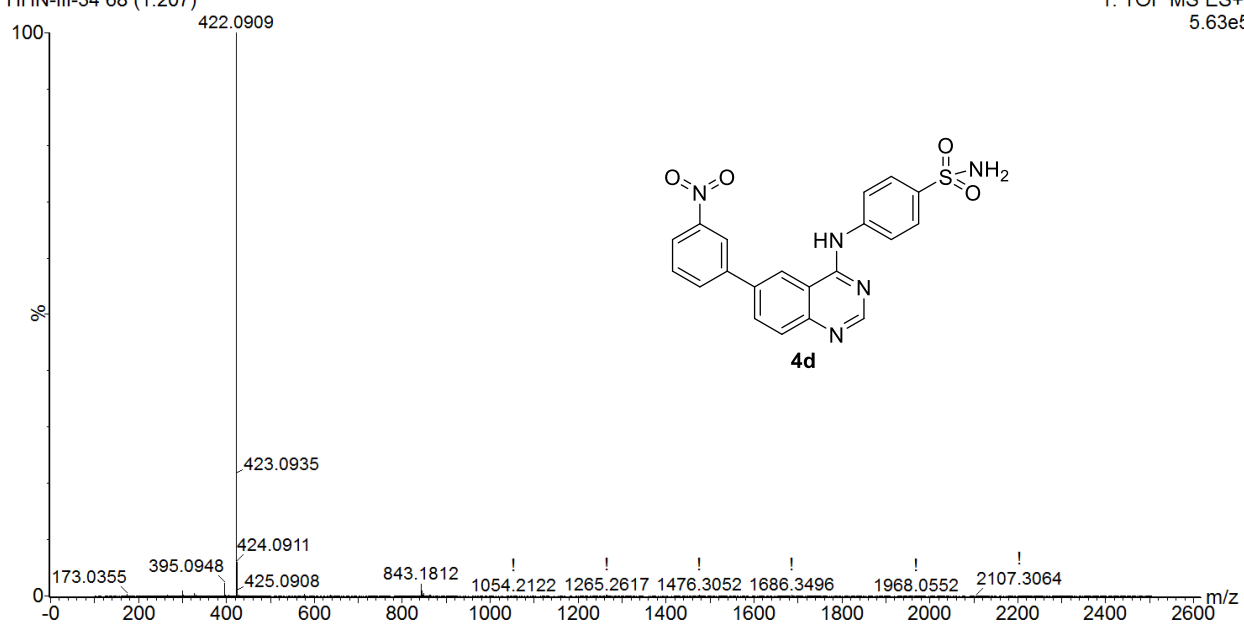

HHN-III-35 68 (1.207)

1: TOF MS ES+  
1.16e6

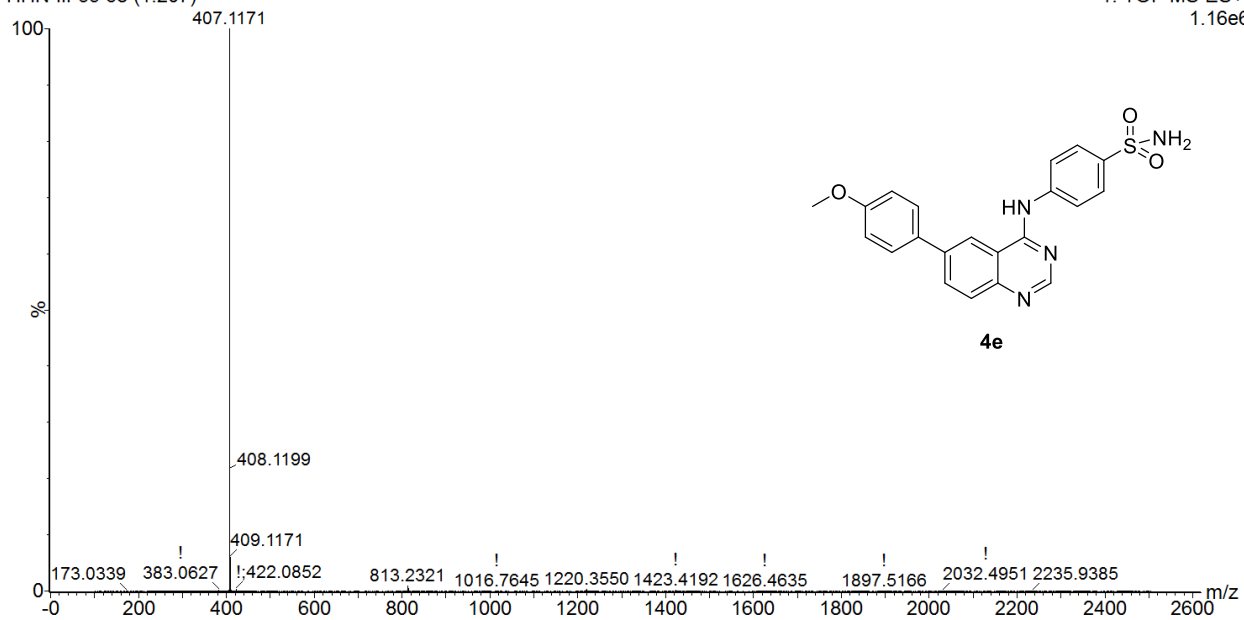

HHN-III-36 69 (1.224)

1: TOF MS ES+  
1.22e6

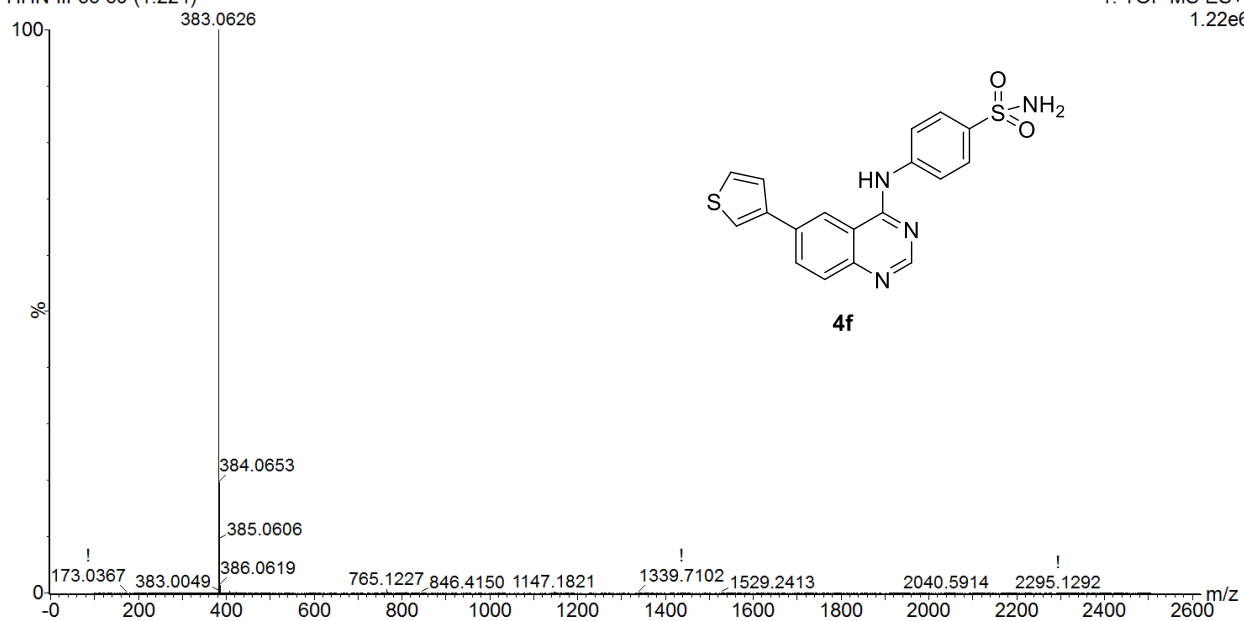

HHN-III-47 69 (1.224)

1: TOF MS ES+  
1.36e6

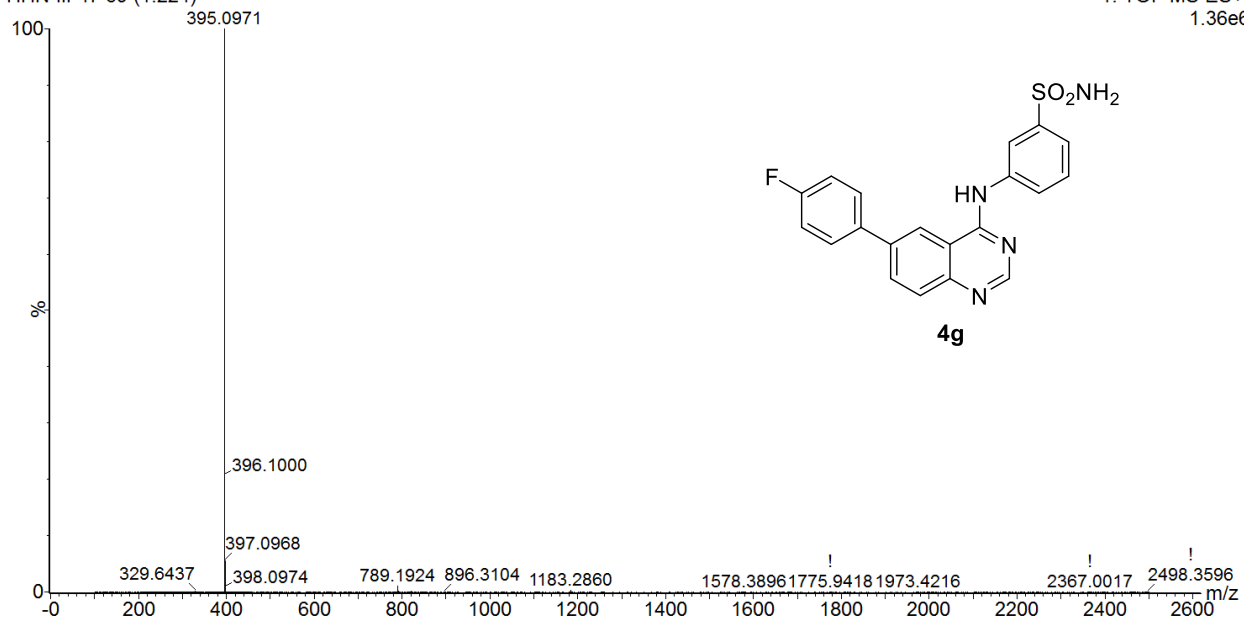

HHN-III-50 65 (1.156)

1: TOF MS ES+  
3.86e5

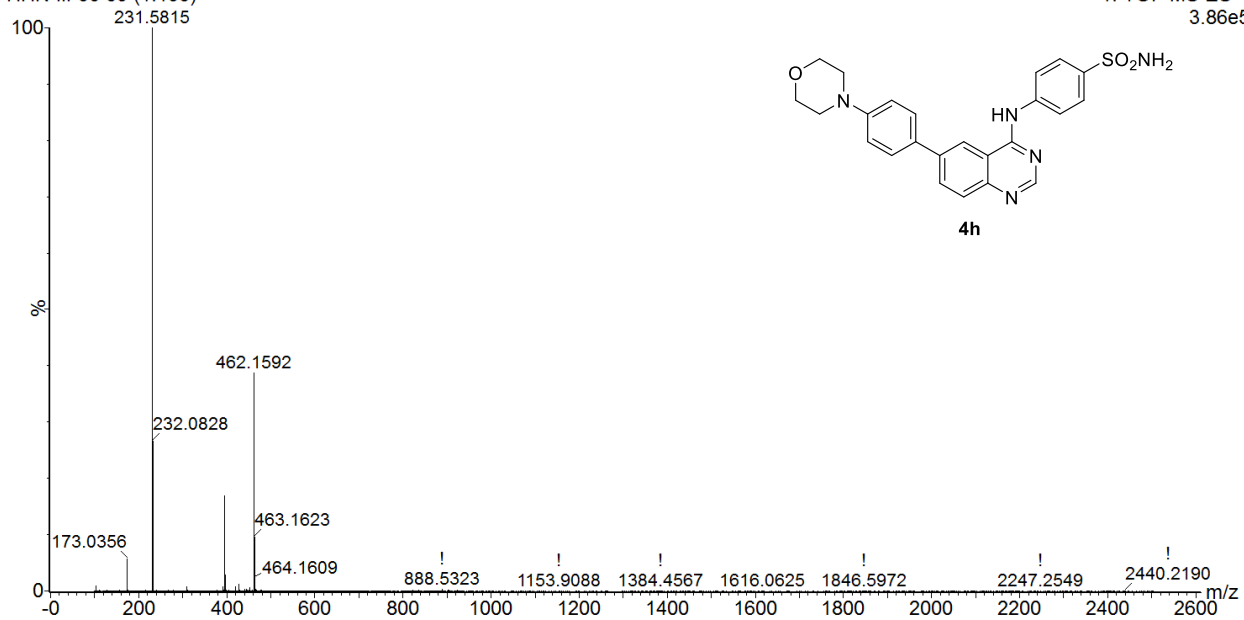

HHN-III-52 65 (1.156)

1: TOF MS ES+  
1.85e5

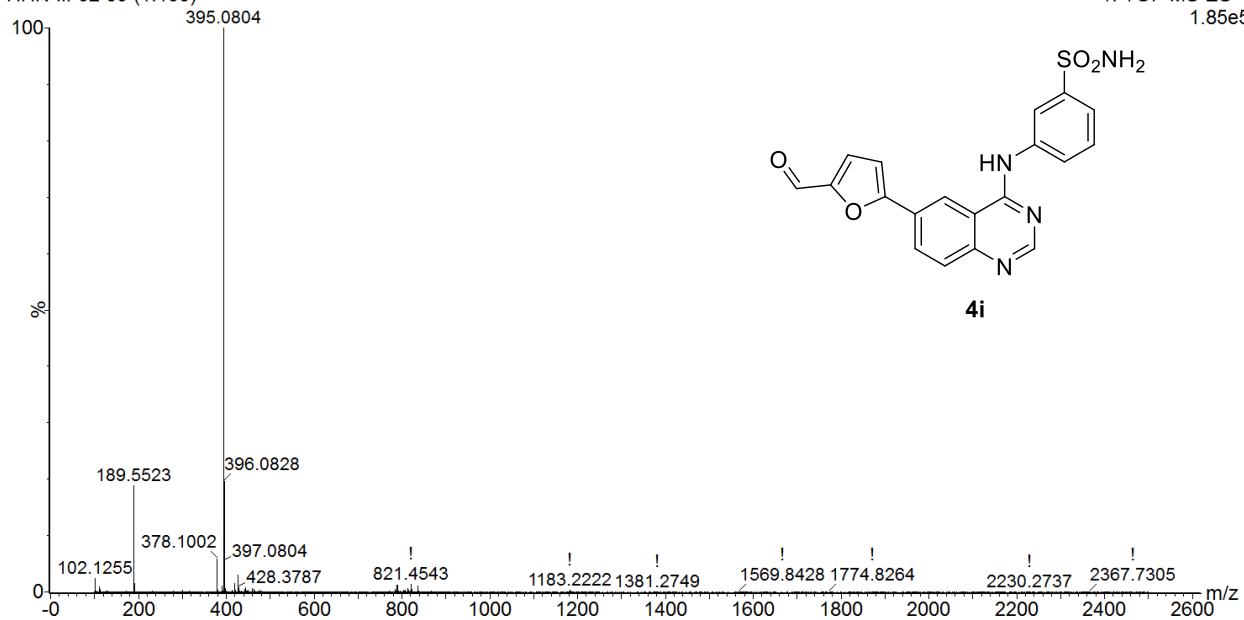

HHN-II-62 79 (1.404)

1: TOF MS ES+  
4.29e4

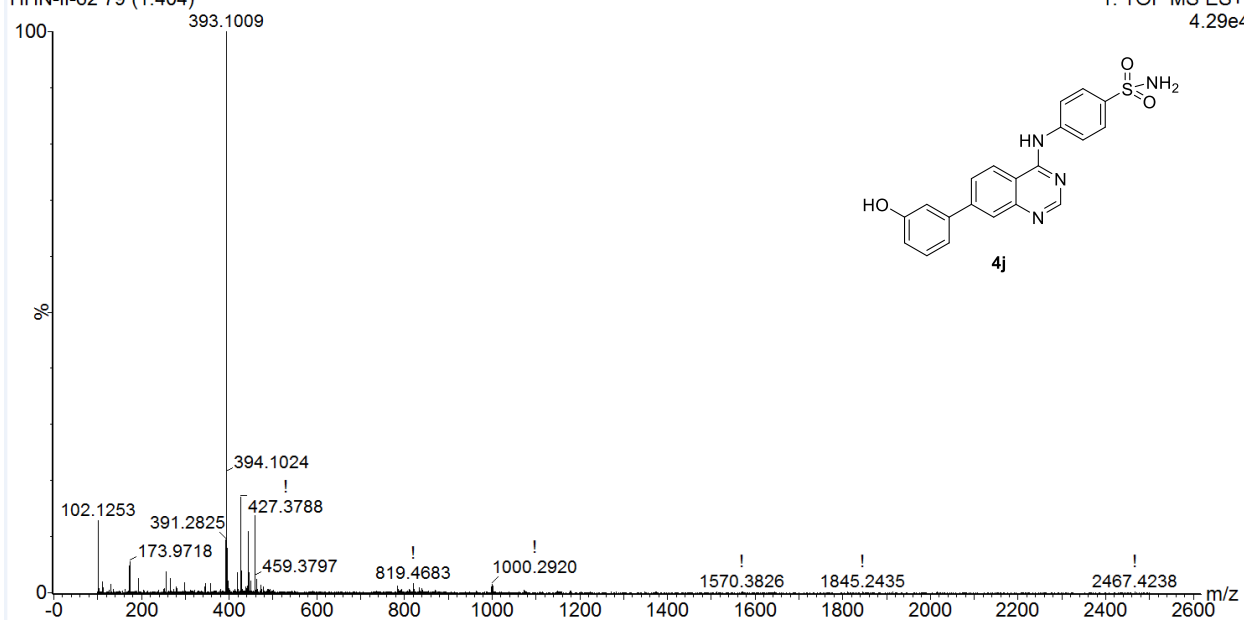

HHN-II-66 56 (0.993)

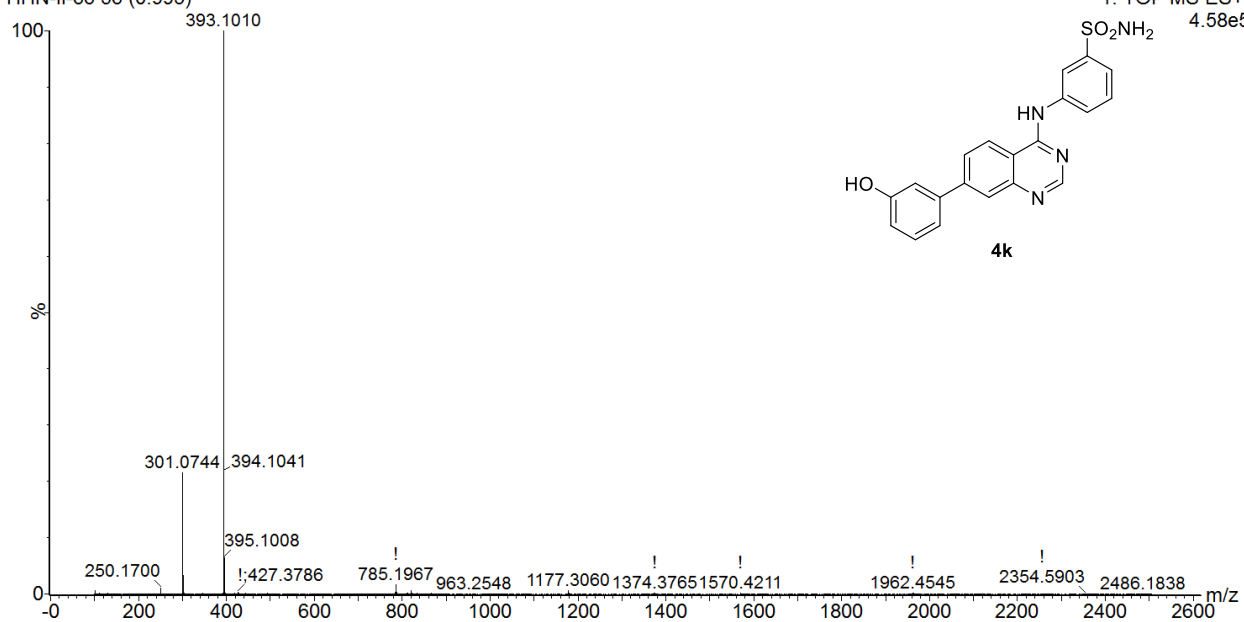

HHN-III-44 58 (1.036)

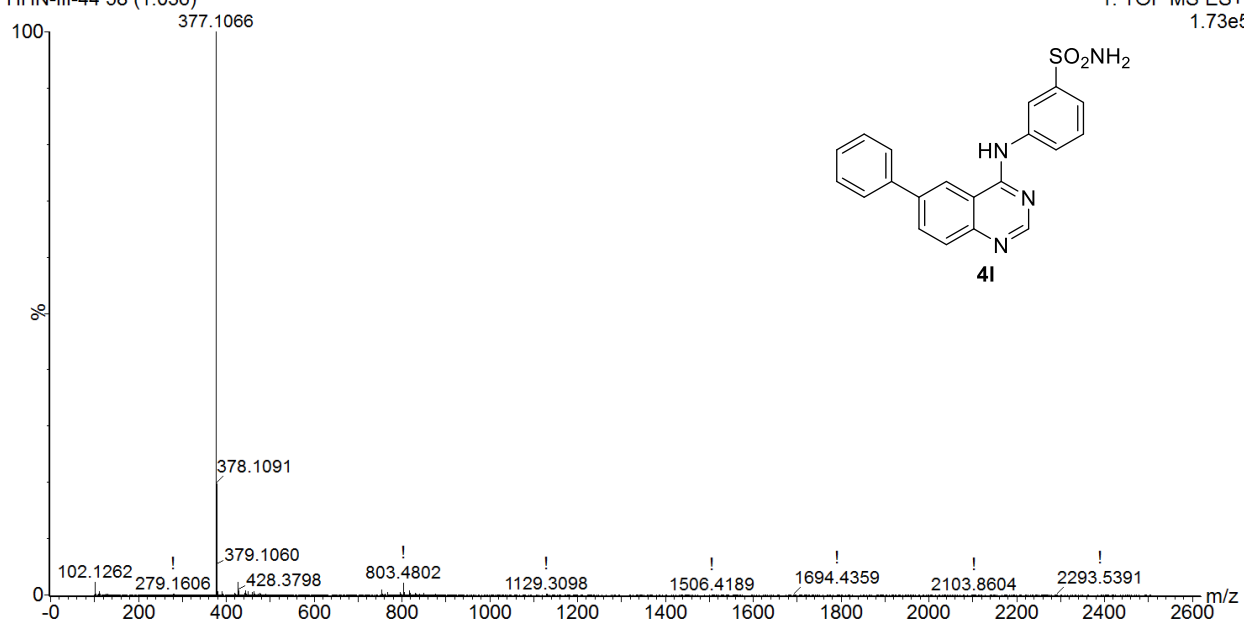

#### 4. Supplementary docking figures

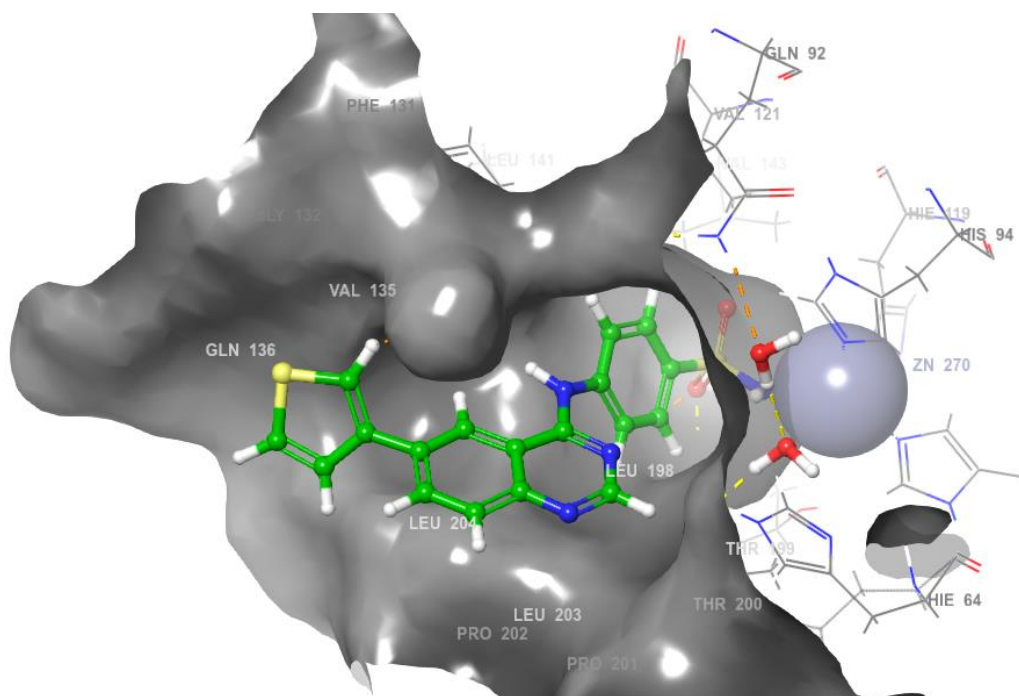

Figure S4.1. 3D model of the crystal structure of hCA II with compound 4f.

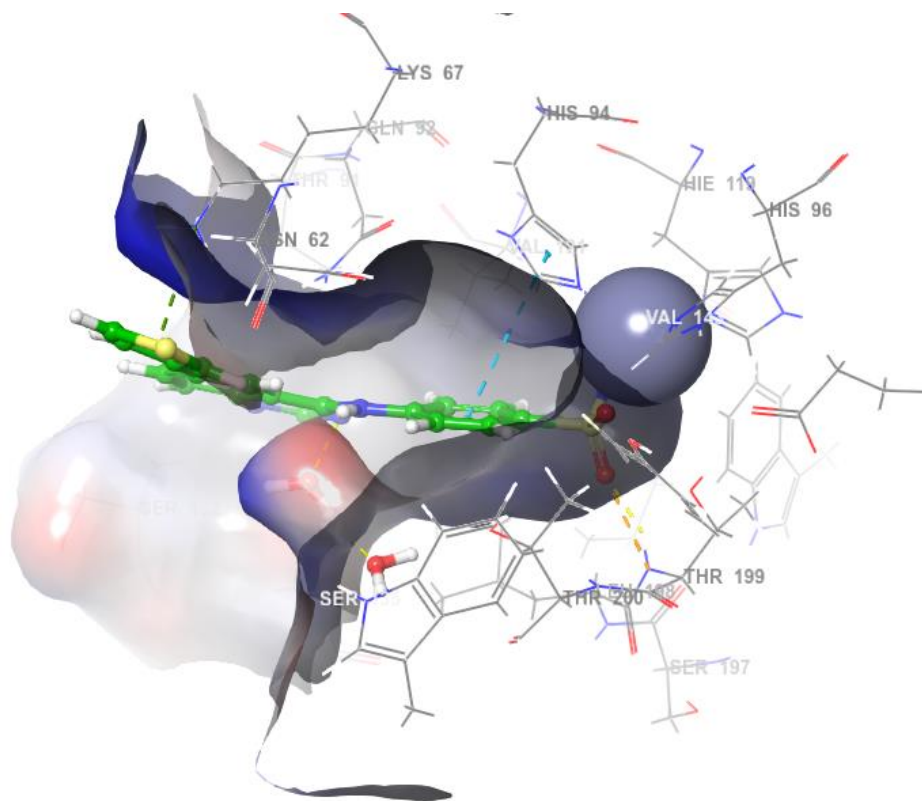

Figure S4.2. 3D model of the crystal structure of hCA XII with compound **4f**.

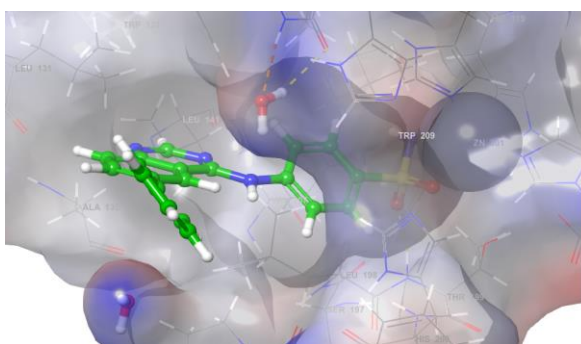

A

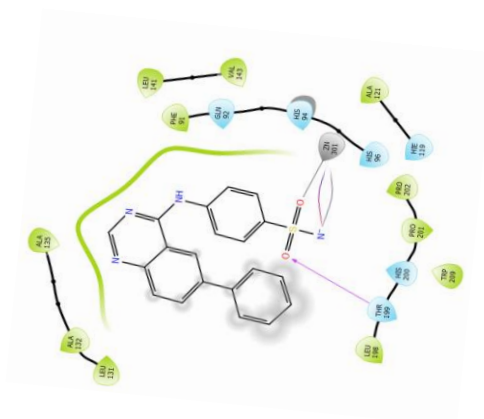

B

Figure S4.3. The interaction patterns of compound **4a** in the active sites of hCAI (A) 3D model of the crystal structure of hCA I with compound **4a**. (B) 2D interaction pattern of compound **4a** with hCA I active site.

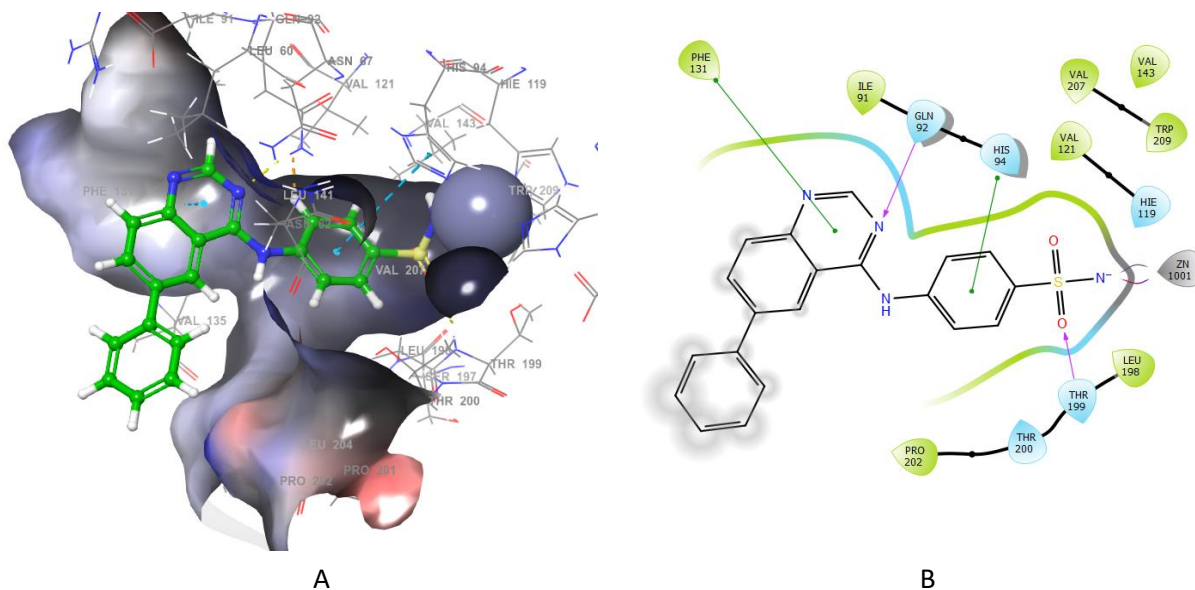

Figure S4.4. The interaction patterns of compound **4a** in the active sites of hCA IX (A) 3D model of the crystal structure of hCA IX with compound **4a**. (B) 2D interaction pattern of compound **4a** with hCA IX active site.

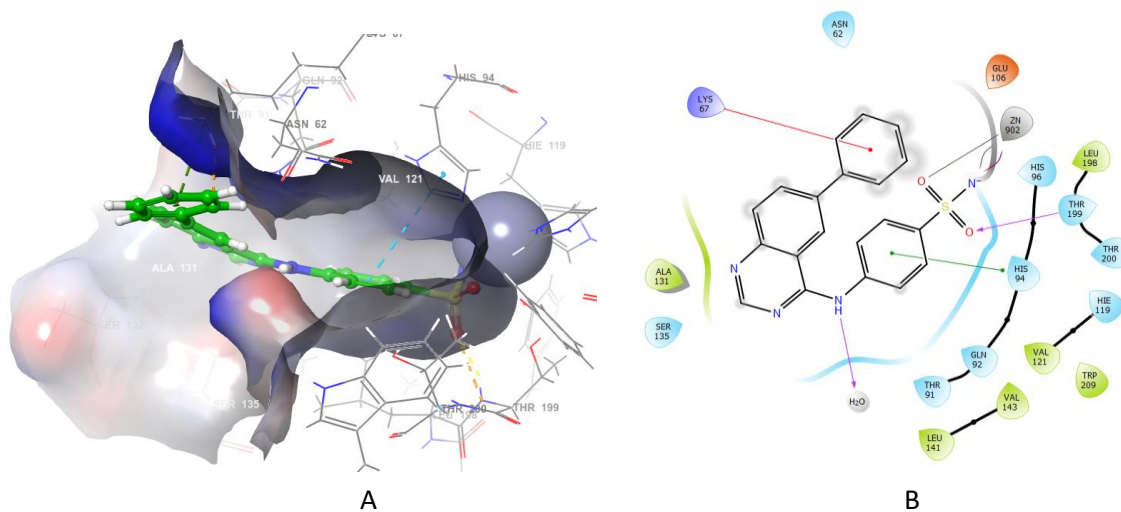

Figure S4.5. The interaction patterns of compound **4a** in the active sites of hCA XII (A) 3D model of the crystal structure of hCA XII with compound **4a**. (B) 2D interaction pattern of compound **4a** with hCA XII active site.
